## 1 Architectural principles for Hfq/Crc-mediated regulation of gene expression

2

3

4 Xue-Yuan Pei<sup>1+</sup>, Tom Dendooven<sup>1+</sup>, Elisabeth Sonnleitner<sup>2</sup>, Shaoxia Chen<sup>3</sup>, Udo Bläsi<sup>2</sup> and Ben F.

5 Luisi<sup>1</sup>

6

7

8 <sup>1</sup>Department of Biochemistry, University of Cambridge, Tennis Court Road, Cambridge CB2 1GA,

9 U.K.

10

11 <sup>2</sup>Department of Microbiology, Immunobiology and Genetics, Max F. Perutz Laboratories, Center of

12 Molecular Biology, University of Vienna, Vienna Biocenter, Dr. Bohrgasse 9, 1030 Vienna, Austria

13

14 <sup>3</sup>MRC Laboratory of Molecular Biology, Francis Crick Avenue, Cambridge, CB2 0QH, U.K.

15

16 <sup>+</sup>These authors made complementary and equal contribution

17

18

19

20

21

22

23

24

25

26 **SUMMARY**

27 The global regulator Hfq facilitates the action of regulatory RNAs in post-transcription gene  
28 regulation in many Gram-negative bacteria. In *Pseudomonas aeruginosa*, Hfq, in conjunction with  
29 the catabolite repression protein Crc, was shown to form a complex that directly inhibits translation  
30 of target transcripts during carbon catabolite repression. Here, we describe and validate high-  
31 resolution cryo-EM structures of the cooperative assembly of Hfq and Crc bound to a translation  
32 initiation site. The core assembly is formed through interactions of two cognate RNAs, two Hfq  
33 hexamers and a Crc pair. Additional Crc protomers can be recruited to form higher-order assemblies  
34 with demonstrated *in vivo* activity. The structures indicate a distinctive RNA conformation and a  
35 pattern of repeating motifs that confer regulatory function. This study not only reveals for the first  
36 time how Hfq cooperates with a partner protein to regulate translation but also provides a novel  
37 structural basis to explain how an RNA code can guide global regulators to interact cooperatively  
38 and regulate many different RNA targets.

39

40

41 Keywords: RNA mediated gene regulation; RNA-protein interaction;

42 RNA chaperone; *Pseudomonas aeruginosa*; catabolite repression control protein; Hfq

## 43 INTRODUCTION

44

45 The control of gene expression in many bacteria is fine-tuned through intricate post-transcriptional  
46 networks mediated by the action of small regulatory RNAs (Wagner and Romby, 2015). Many of  
47 these regulatory molecules require the RNA chaperone Hfq, which protects the RNA against  
48 ribonucleases and facilitates their base-pairing interactions with cognate RNA targets (Vogel and  
49 Luisi, 2011). Hfq is a member of the Lsm/Sm family and shares with that group an ancient structural  
50 core that oligomerizes to form toroidal architectures exposing several RNA-binding surfaces.  
51 Crystallographic and biophysical data show that RNA recognition is mediated by distinct interactions  
52 with distal, proximal and rim faces (Schumacher et al., 2002; Link et al., 2009; Sauer et al., 2012;  
53 Panja et al., 2013), as well as revealing the role of the natively unstructured C-terminal tail in  
54 autoregulating RNA binding activities (Santiago-Frangos et al., 2016; 2017).

55 In the opportunistic pathogen *Pseudomonas aeruginosa*, Hfq acts as a pleiotropic regulator  
56 of metabolism (Sonnleitner and Bläsi, 2014), virulence (Sonnleitner et al., 2003; Fernandez et al.,  
57 2016; Pusic et al., 2016), quorum sensing (Sonnleitner et al., 2006; Yang et al., 2015) and stress  
58 responses (Lu et al., 2016). Many of these roles are likely facilitated through partner molecules, and  
59 numerous putative protein interactors of *P. aeruginosa* Hfq have been identified with functions in  
60 transcription, translation and mRNA decay (Van den Bossche et al., 2014). In the case of Hfq from  
61 *Escherichia coli*, the functionally important partners include RNA polymerase, ribosomal protein S1  
62 (Sukhodolets and Garges, 2003), the endoribonuclease RNase E (Ikeda et al., 2011), polyA-  
63 polymerase, and the exoribonuclease polynucleotide phosphorylase (Mohanty et al., 2004; Bandyra  
64 et al., 2016). Most likely, these complexes are RNA mediated and affect the colocalisation of the  
65 transcriptional, translational and RNA decay machineries (Worrall et al., 2008; Resch et al., 2010;  
66 Večerek et al., 2010).

67 One *P. aeruginosa* protein that was found to co-purify with tagged Hfq is the Catabolite

68 repression control protein, Crc (Van den Bossche et al., 2014; Moreno et al., 2015; Sonnleitner et  
69 al., 2018). Crc is involved in carbon catabolite repression (CCR) in *Pseudomonas*, a process that  
70 channels metabolism to use preferred carbon sources (such as succinate) until they are exhausted,  
71 whereupon alternative sources are used (Rojo, 2010). Crc strengthens binding of A-rich target  
72 transcripts to the distal side of Hfq (Sonnleitner et al., 2018). In this way, translational repression  
73 arises through binding of both Hfq and Crc to A-rich ribosome-binding sequences of mRNAs sensitive  
74 to catabolite repression, such as *amiE* mRNA, encoding aliphatic amidase (Sonnleitner et al., 2009;  
75 Sonnleitner and Bläsi, 2014). The translationally repressed mRNA, e.g. *amiE*, is then subjected to  
76 degradation, which might trigger disassembly of the Hfq/Crc/RNA complex (Sonnleitner and Bläsi,  
77 2014). The non-coding RNA CrcZ, which increases in levels when the preferred carbon source is  
78 exhausted, was shown to sequester Hfq, and thereby to counteract Hfq/Crc mediated translational  
79 repression of mRNAs related to catabolism (Sonnleitner et al., 2009; Sonnleitner and Bläsi, 2014).  
80 CrcZ expression is under control of the alternative sigma factor RpoN and the two-component  
81 system CbrA/B (Sonnleitner et al., 2009). Although the signal responsible for CbrA/B activation  
82 remains unknown, it is thought to be related to the cellular energy status (Valentini et al., 2014).

83 In addition to carbon catabolite repression, Hfq and Crc link key metabolic and virulence  
84 processes in *Pseudomonas* species. The two proteins affect biofilm formation, motility (O'Toole et  
85 al., 2000, Huang et al., 2012, Zhang et al., 2012; Pusic et al., 2016), biosynthesis of the virulence  
86 factor pyocyanin (Sonnleitner et al., 2003; Huang et al., 2012), and they have been shown to affect  
87 antibiotic susceptibility (Linares et al., 2010; Heitzinger, 2016). Recent ChiP-seq studies indicate that  
88 Hfq and Crc have an even broader regulatory impact in *Pseudomonas*. It was shown that these  
89 regulators can work in concert to bind many nascent transcripts co-translationally, uncovering a  
90 large number of regulatory targets (Kambara et al., 2018).

91 To gain insight into how *P. aeruginosa* Hfq cooperates with Crc in translational repression of  
92 mRNAs, we determined the structure of the complex they form on the Hfq binding motif of the CCR-

93 controlled *amiE* mRNA using cryo-electron microscopy (cryoEM). Our analyses revealed that the  
94 components form higher order assemblies and explain for the first time how a recurring structural  
95 motif can support the association of Hfq and RNA into cooperative ribonucleoprotein complexes  
96 that have key regulatory roles. We observe that the interactions supporting the quaternary  
97 structure are required for *in vivo* translational regulation. These findings expand the paradigm for  
98 *in vivo* action of Hfq through cooperation with the Crc helper protein and RNA to form effector  
99 assemblies.

100

## 101 **RESULTS**

102

### 103 ***An ensemble of Hfq/Crc/amiE<sub>6ARN</sub>RNA assemblies***

104 For cryo-EM structural studies of the Hfq/Crc/RNA complex, purified recombinant Hfq and Crc  
105 proteins were mixed with an 18 nucleotide Hfq binding motif from the translation initiation region  
106 of the CCR-controlled *amiE* mRNA, which encodes aliphatic amidase (hereafter, *amiE<sub>6ARN</sub>*). This  
107 binding motif comprises of 6 repeats of an A-R-N pattern preferred by the distal face of Hfq. The  
108 purified sample of Hfq/Crc/*amiE<sub>6ARN</sub>*, after mild chemical crosslinking, yielded well defined single  
109 particles on graphene oxide in thin, vitreous ice. Analysis of the reference free 2D class averages  
110 and subsequent 3D classification indicated three principal types of complexes corresponding to  
111 different stoichiometries of Hfq (hexamer):Crc:*amiE<sub>6ARN</sub>* with compositions 2:2:2, 2:3:2 and 2:4:2  
112 (Figure 1). These higher order assemblies are in agreement with recently observed SEC-MALS and  
113 mass spectrometry results which excluded a simple 1:1:1 assembly (Sonnleitner et al., 2018). The  
114 maps for the complexes are estimated to be 3.12 Å, 3.27 Å and 3.27 Å in resolution, respectively,  
115 based on gold-standard Fourier shell correlations (Figure 1 – figure supplement 1). The distribution  
116 of the complexes corresponds to roughly 40%, 33% and 26% for the 2:2:2, 2:3:2 and 2:4:2 complexes  
117 (Figure 1). The individual crystal structures of Hfq and Crc dock well into the cryoEM densities (Figure

118 1 and Figure 1 – figure supplement 2), and aside from side chain rotations there are few other  
119 structural changes of the components (Figure 1 – figure supplement 2). CryoEM analyses of samples  
120 that had not been treated by crosslinking show that the quaternary structure was not affected by  
121 the treatment (Table S1).

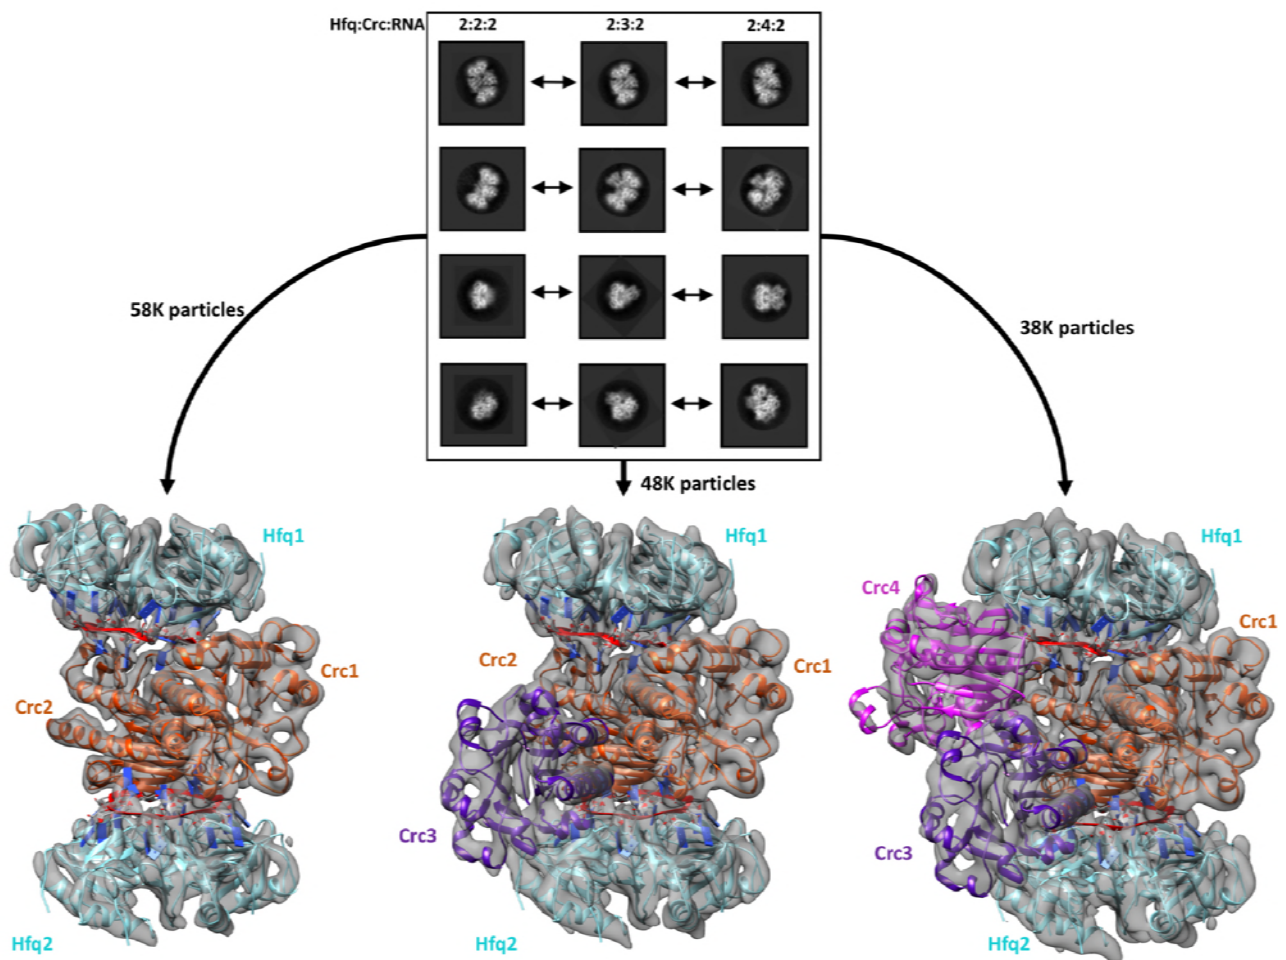

122

**Figure 1.** Reference free 2D classification and 3D classification of Hfq:Crc:RNA particles. Three main classes of particles were observed after reference-free 2D classification (top), corresponding to Hfq:Crc:*amiE*<sub>6ARN</sub> stoichiometries of 2:2:2, 2:3:2 and 2:4:2. The *amiE*<sub>6ARN</sub> species (red) constitute the main interaction interface between Hfq and Crc, together forming the 2:2:2 core complex observable in all three models (bottom). Cyan: Hfq Hexamer, orange purple and pink: Crc monomers, red: *amiE*<sub>6ARN</sub>. All cryoEM maps were low-pass filtered to 6 Å for interpretability and the crystal structures were docked in as rigid bodies. For clarity, only a subset of all the high quality 2D classes are shown in the panel.

123

124 In the core complex (2:2:2), the two Hfq hexamers sandwich the RNA and Crc components  
125 (Figure 2A). Each Hfq interacts with one *amiE*<sub>6ARN</sub> RNA and two Crc molecules, forming an assembly  
126 with C2 symmetry. The molecular twofold axis passes through the centre of the two Crc molecules,



127 and the same Crc-to-Crc interface is observed in the crystal structure of the isolated Crc dimer  
 128 (generated through crystallographic symmetry) (Milojevic et al., 2013). As anticipated, the  
 129 dominating protein/RNA interaction is made by the distal face of Hfq, forming an interface area of  
 130  $\sim 2270 \text{ \AA}^2$ . The two Crc molecules interact with RNA residues exposed on the surface of Hfq, and both  
 131 Crc molecules contact the Hfq-rim on the distal side (Figure 2A).

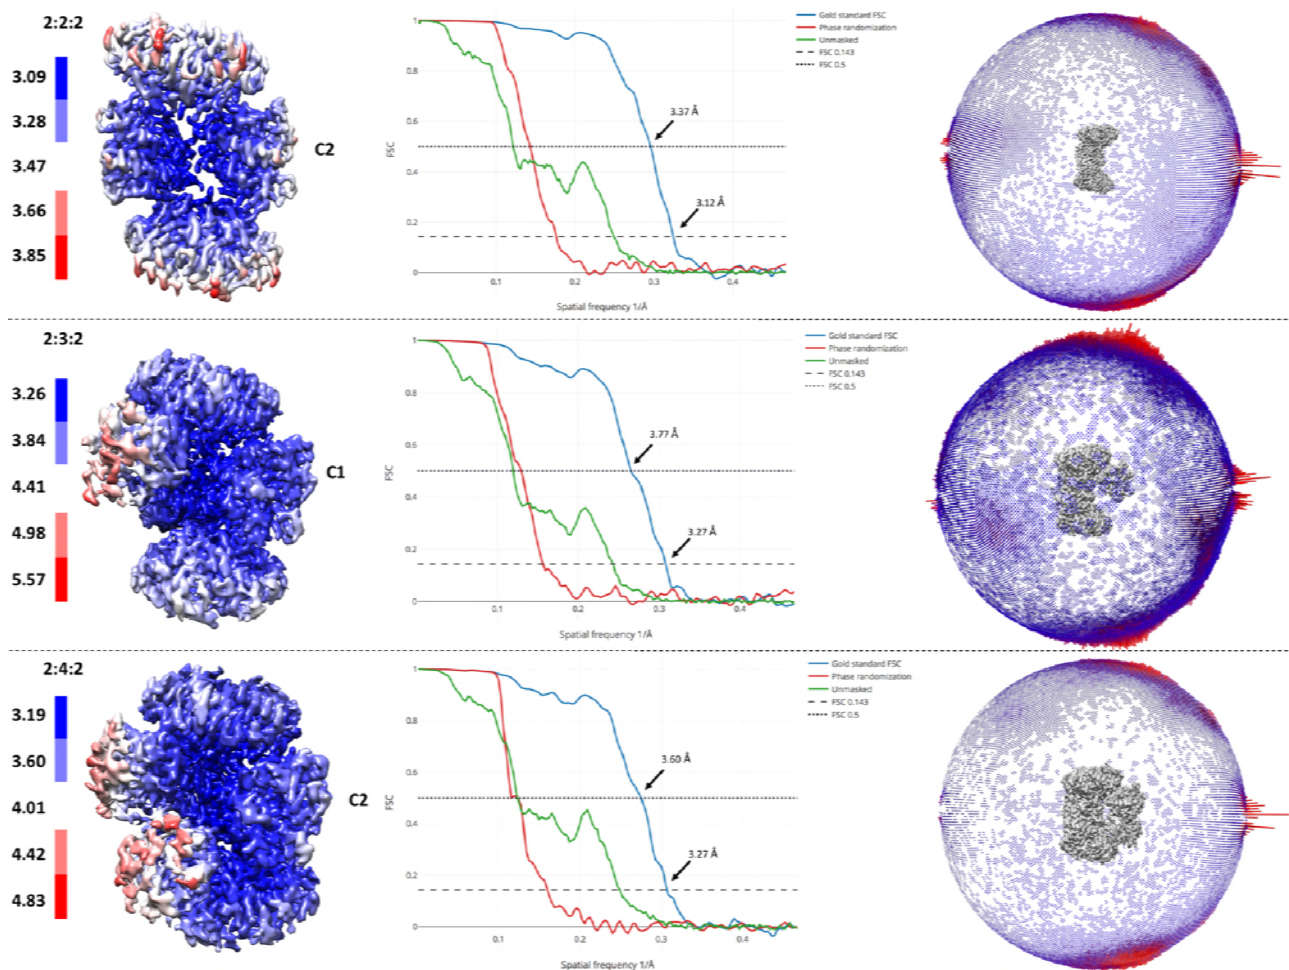

132  
 133 **Figure 1 – figure supplement 1.** Resolution estimates across the EM maps and Gold standard Fourier shell  
 134 correlation curves for all three reconstructions. FSC 0.143 and 0.5 are annotated. Angular distributions of  
 135 the 2D images are presented as a spherical bar plot, with red bars representing more preferred projections.  
 136

137 The Crc forms antiparallel dimers in the 2:2:2-complex, so there are two modes of interaction with  
 138 the *amiE*<sub>6ARN</sub> RNA. Each binding mode is used once at either of the interfaces with Hfq/RNA (Figure  
 139 2A). In each Crc monomer, Arg140  $\eta^1$ -NH<sub>2</sub> and Arg141  $\epsilon$ -NH and  $\eta^1$ -NH<sub>2</sub> interact with the  
 140 phosphodiester backbone of *amiE*<sub>6ARN</sub>. Arg140 and Arg196 form a sandwich with the purine-base  
 141 of the A3 nucleotide at an entry/exit site of *amiE*<sub>6ARN</sub> RNA. The Arg196  $\epsilon$ -NH and  $\eta^1$ -NH<sub>2</sub> groups  
 142 form hydrogen bonds with the U6-*amiE*<sub>6ARN</sub> backbone and the U6 O2 group forms a hydrogen  
 143 bond with the Met156 amide. In the second mode of interaction, Lys155  $\zeta$ -NH<sub>2</sub> makes a hydrogen  
 144 bond with the OP<sub>2</sub>-group of C9 and the ribose hydroxyl group. Additional hydrogen bonds are  
 145 formed between Trp161  $\epsilon^1$ -NH and Arg162  $\eta^{1/2}$ -NH<sub>2</sub> and the phosphate backbone of *amiE*<sub>6ARN</sub>  
 146 (Figure 2A). These highly organised interactions illustrate how the bases of *amiE*<sub>6ARN</sub> as presented

147 by Hfq constitute a molecular interface for the RNA-mediated interactions between Hfq and Crc.

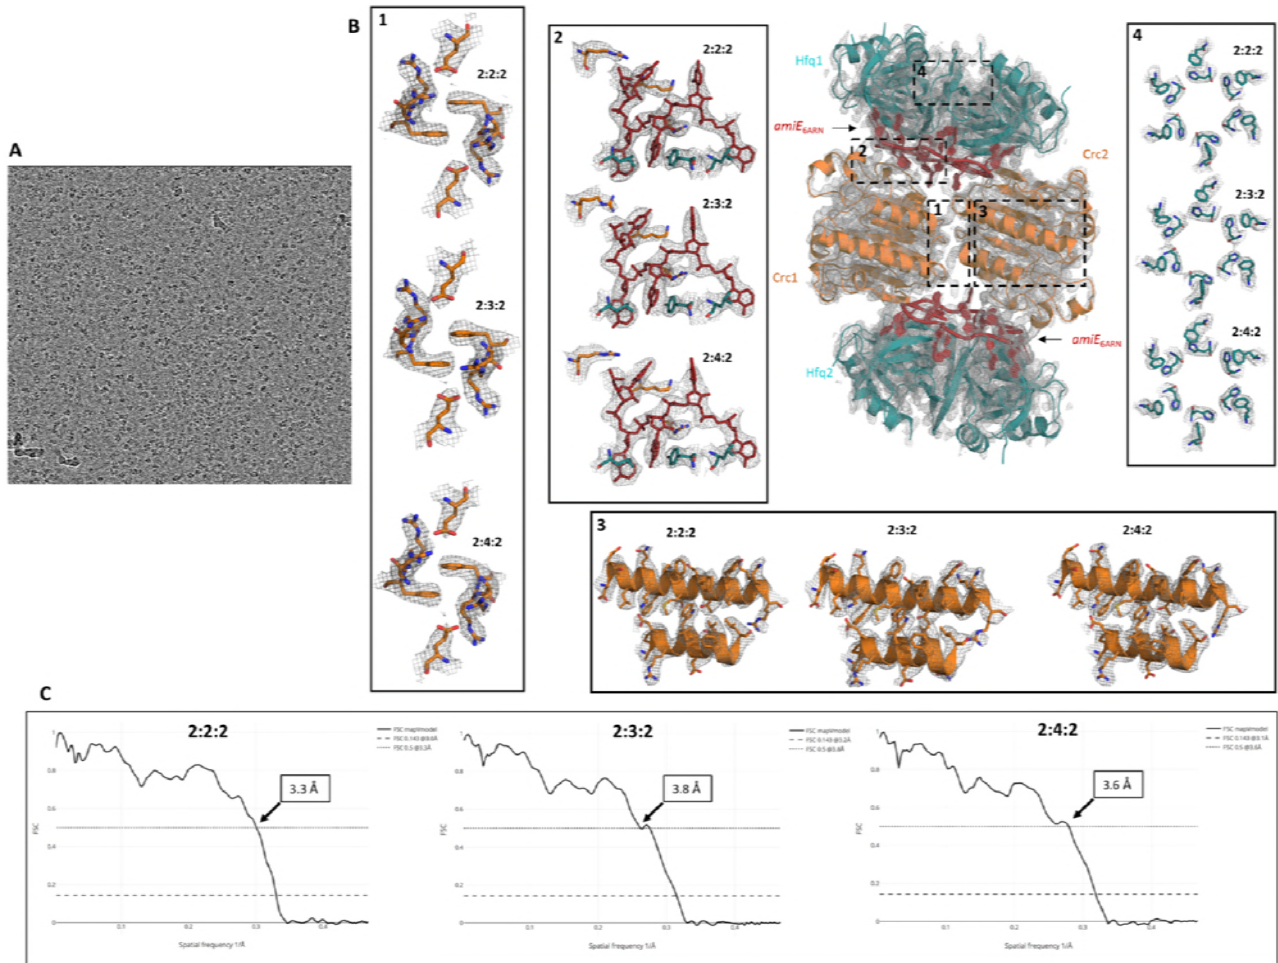

148  
 149  
 150 **Figure 1 – figure supplement 2.** A. Raw micrograph after motion correction at 3 microns under focus. B. High  
 151 resolution cryo-EM map with refined atomic models for all complexes showing the quality of the EM  
 152 reconstructions. All maps and models were generated and refined independently of each other and a high-  
 153 resolution reference structure, showing well defined and highly reproducible densities for all side chains in  
 154 these signature regions. Even at the periphery the map density is of good quality, maintaining the sixfold  
 155 symmetry of the Hfq components (inset 4). C. Model versus map Fourier shell correlation (FSC) show a good  
 156 correlation between the individual atomic models and the experimental cryo-EM maps. FSC 0.5 is annotated  
 157 on the graph, whereas FSC 0.143 is annotated in the legends.  
 158

159 The quaternary organisation of the 2:2:2 complex forms a core unit that is also present in the 2:3:2  
 160 and 2:4:2 complexes. In that common core, the interaction of the Crc with the RNA leaves  
 161 approximately half of the accessible surface of the nucleic acid exposed. For the 2:3:2 and 2:4:2  
 162 complexes, additional Crc units are recruited through interactions with the exposed portion of the  
 163 RNA (Figure 3A). As such, the C2 symmetry is broken by the third Crc molecule in the 2:3:2 complex  
 164 (Figure 1). Interestingly, recruitment of a fourth Crc monomer to the complex restores the C2  
 165 symmetry, preserving the symmetry axis from the core complex, but with a conformationally



166 different Crc dimer interface between Crc molecules 3 and 4 (Figure 3A). The two additional Crc  
 167 monomers have small surface-area contacts with the rest of the complex and are likely to be  
 168 comparatively mobile, which may account for the stronger variation in resolution for the 2:3:2 and  
 169 2:4:2 maps compared to the rather rigid 2:2:2 core assembly (Figure 1- figure supplement 1).

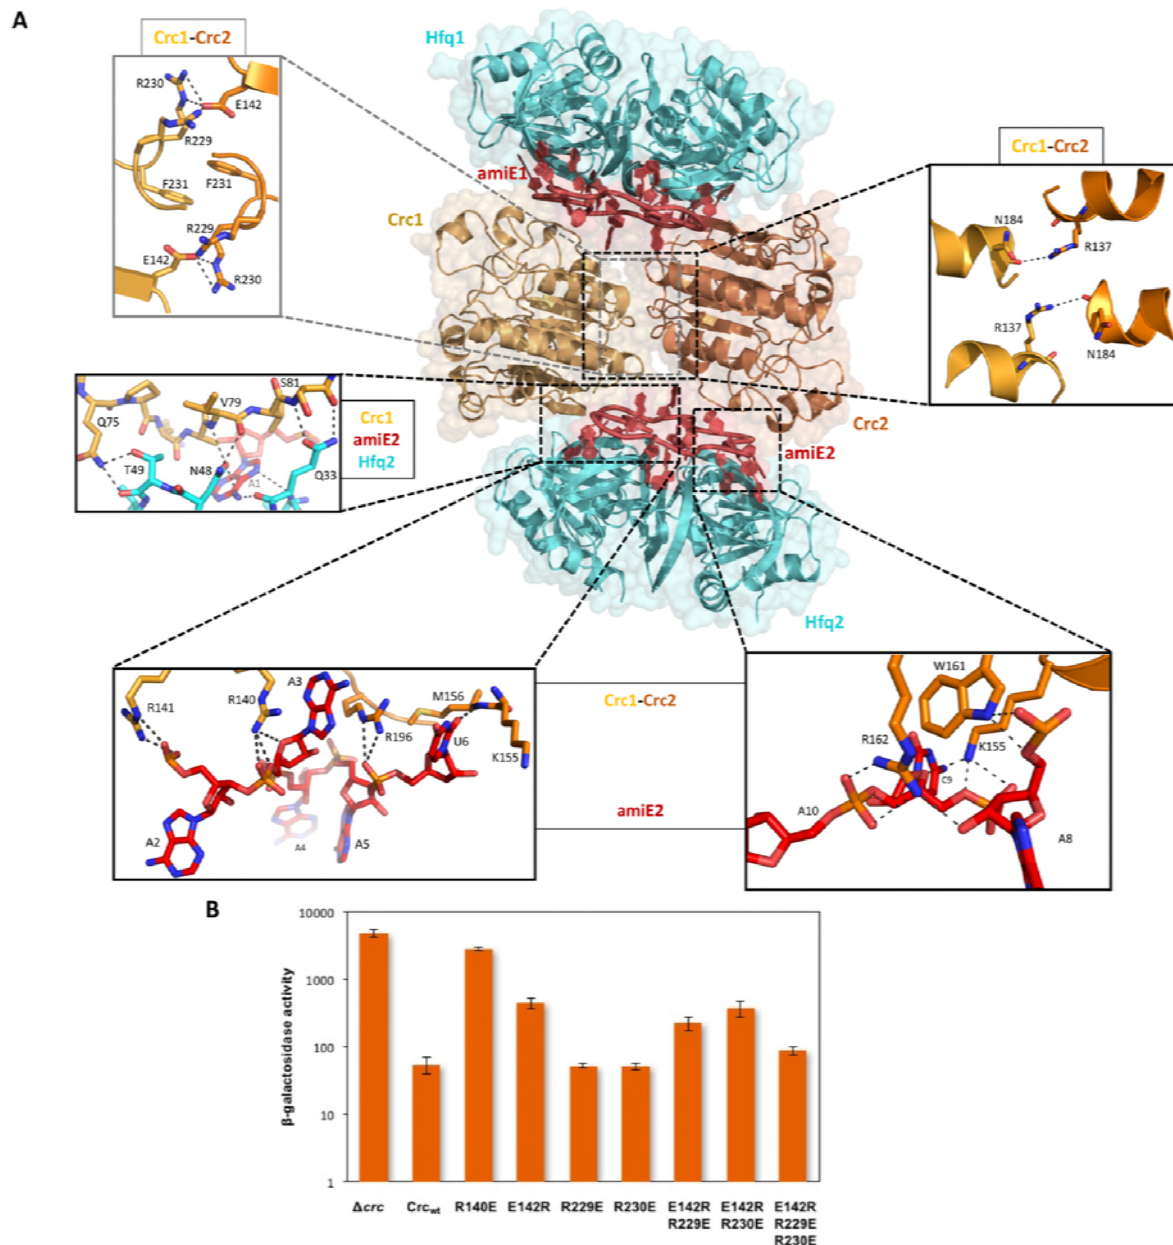

170

171 **Figure 2.** Model of the 2:2:2 Hfq:Crc:RNA complex and validation of interactions. A. Atomic model  
 172 of the 2:2:2 Hfq:Crc:RNA complex. The view is along the C2 molecular symmetry axis which passes  
 173 through the homodimeric Crc interface. Hfq hexamers flank the Crc dimer and present the *amiE*<sub>GARN</sub>  
 174 RNA to form two different interfaces with the Crc protomers, which form an anti-parallel dimer. The  
 175 Crc protomers form strong polar contacts with mainly the backbone phosphate groups and exposed  
 176 ribose rings (bottom 2 insets). Two small C2 symmetric binding interfaces constitute the Crc  
 177 dimerisation (top 2 insets). A single short stretch on each Crc monomer binds a Hfq monomer

178 (middle left panel). Dimeric Crc in yellow and orange, *amiE*<sub>6ARN</sub> RNA in red, Hfq hexamers in cyan. B.  
179 Translational repression of an *amiE::lacZ* reporter gene by Crc variants. Strain PAO1 $\Delta$ *crc*(pME9655)  
180 harboring plasmids pME4510 (vector control), pME4510<sub>crc</sub><sub>Flag</sub> (Crc<sub>wt</sub>) or derivatives thereof  
181 encoding the respective mutant proteins was grown to an OD<sub>600</sub> of 2.0 in BSM medium  
182 supplemented with 40 mM succinate and 40 mM acetamide. The  $\beta$ -galactosidase values conferred  
183 by the translational *amiE::lacZ* fusion encoded by plasmid pME9655 in the respective strains are  
184 indicated. The results represent data from two independent experiments and are shown as mean  
185 and range.

186

187

### 188 ***Function, origins and validation of subunit cooperativity in the 2:2:2 complex***

189 Hfq binds the *amiE*<sub>6ARN</sub> RNA avidly with a dissociation constant in the nanomolar range, but in  
190 contrast Crc has no intrinsic RNA-binding activity (Milojevic et al., 2013). In the presence of Crc, the  
191 off-rate for Hfq on *amiE*<sub>6ARN</sub> decreases (Sonnleitner et al., 2018), which indicates a cooperation of  
192 the components in binding RNA. The complexes revealed here show that Crc forms small contact  
193 surfaces to the RNA, to Hfq, and to itself as a homodimer; these small areas work together to give  
194 an assembly that is most likely stabilised through chelate cooperativity. Notably, there is a striking  
195 absence of any lower order assemblies in the cryo EM micrographs. The 2:2:2 complex is therefore  
196 likely to be the minimal complex formed when all components are present and must be constructed  
197 in an ‘all or nothing’ manner, somewhat like a binary switch.

198 The dimer interface of the Crc pair is the largest protein-protein interface in the 2:2:2-  
199 complex and has a buried area of 766 Å<sup>2</sup>, which typically corresponds to a moderate intermolecular  
200 affinity. The key dimerization interface is maintained by salt bridges between Arg229-Arg230 of one  
201 Crc monomer and Glu142 of the second Crc monomer, which is further stabilised by pi-stacking of  
202 the Phe231-Phe231 rings at the point of symmetry (Figure 2A). The phenylalanine residues are in  
203 turn stabilised by stacking interactions with Trp255 of the same Crc monomer (not shown). Two  
204 additional polar contacts are formed between Arg137 and the Asn184 carbonyl group of two pairs  
205 of helices in the Crc dimer, forming a smaller secondary interface (Figure 2A).

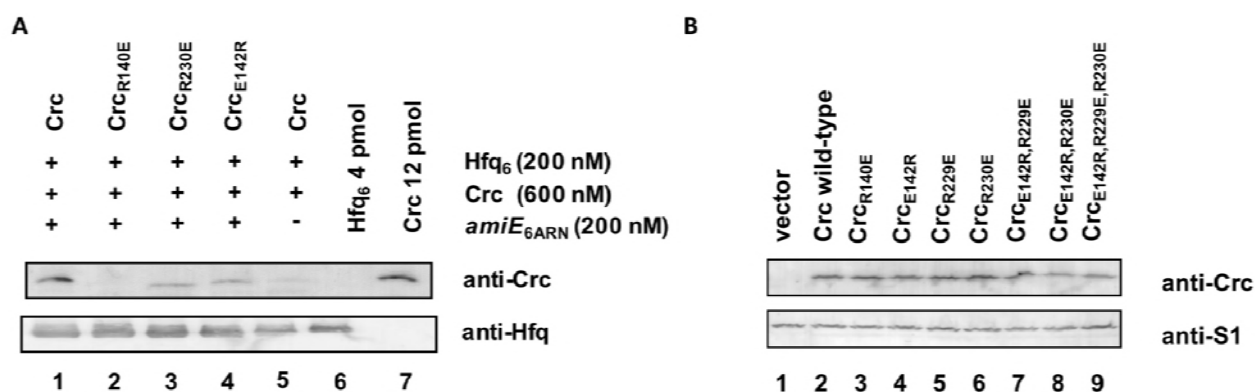

206  
 207 **Figure 2 – Figure Supplement 1.** A. *In vitro* association of Hfq and Crc and Crc variants in the presence of RNA.  
 208 The *in vitro* co-IP experiments were performed with Hfq and Crc and variants in the presence (lanes 1-4) and  
 209 absence (lane 5) of *amiE*<sub>6ARN</sub> RNA as indicated on top. Anti-Hfq specific antibodies and magnetic protein G  
 210 beads were used for co-IP of Crc and Crc variants. The *in vitro* association of Hfq with Crc and variants thereof  
 211 was visualized by western-blot analysis using anti-Crc or anti-Hfq specific antibodies as indicated at the right.  
 212 Lane 5, control experiment in the presence of Hfq and Crc but in the absence of RNA. Lanes 6 and 7, 4 pmol  
 213 Hfq and 12 pmol Crc were loaded, respectively. The western-blot analyses were performed in triplicate. The  
 214 result from one representative experiment is shown. B. Crc variants are synthesized at comparable levels.  
 215 Cultures of PAO1Δ*crc*(pME9655,pME4510) (lane 1), PAO1Δ*crc*(pME9655,pME4510*crc*<sub>Flag</sub>) (lane 2),  
 216 PAO1Δ*crc*(pME9655, pME4510*crc*<sub>(R140E)Flag</sub>) (lane 3), PAO1Δ*crc*(pME9655,pME4510*crc*<sub>(E142R)Flag</sub>) (lane 4),  
 217 PAO1Δ*crc*(pME9655,pME4510*crc*<sub>(R229E)Flag</sub>) (lane 5), PAO1Δ*crc*(pME9655,pME4510*crc*<sub>(R230E)Flag</sub>) (lane 6),  
 218 PAO1Δ*crc*(pME9655, pME4510*crc*<sub>(E142R,R229E)Flag</sub>) (lane 7), PAO1Δ*crc*(pME9655, pME4510*crc*<sub>(E142R,R230E)Flag</sub>) (lane  
 219 8) and PAO1Δ*crc*(pME9655, pME4510*crc*<sub>(E142R,R229E,R230E)Flag</sub>) (lane 9), respectively, were grown to an OD<sub>600</sub> of  
 220 2.0 in BSM medium supplemented with 40 mM succinate and 40 mM acetamide. The protein levels of Crc  
 221 and Crc variants (top) and of ribosomal protein S1 (loading control) were determined by quantitative  
 222 western-blot analysis using anti-Crc and anti-S1 antibodies, respectively. The western-blot analyses were  
 223 performed in triplicate. The result from one representative experiment is shown.  
 224

225  
 226 The observed interactions shown for the 2:2:2 Hfq:Crc:RNA complex (Figure 2A) are  
 227 consistent with genetic, biochemical and biophysical data, which revealed intermolecular  
 228 interactions between Crc protomers, interactions between Crc and RNA as well as a few interactions  
 229 between Crc and Hfq. These data also showed that formation of the Hfq/Crc/RNA complex requires  
 230 binding of the RNA on the distal face of Hfq (Sonnleitner et al., 2018). To verify selected interactions  
 231 between the Crc protomers and Crc and RNA, we explored the effects of mutations on translational  
 232 repression of an *amiE::lacZ* reporter gene by Hfq and Crc (Sonnleitner et al., 2018), and on the  
 233 capacity of Hfq and Crc to co-immunoprecipitate in the presence of *amiE*<sub>6ARN</sub> RNA. First, we asked  
 234 whether R140 (Crc<sub>R140</sub>) is required for the interaction of the protein with the RNA (Figure 2A, bottom  
 235 left inset). As shown in Figure 2B, the Crc<sub>R140E</sub> mutant was deficient in repression of the *amiE::lacZ*

236 reporter gene, similarly as observed in the *crc* deletion strain. Moreover, Crc<sub>R140E</sub> did not co-  
237 immunoprecipitate with Hfq in the presence of *amiE*<sub>6ARN</sub> RNA (Figure 2 – figure supplement 1),  
238 strongly indicating that the interaction between Crc<sub>R140</sub> and RNA is pivotal for Hfq:Crc:RNA complex  
239 formation.

240 Next, we focused on the possible role of the salt bridges between the E142 and R229/R230  
241 ‘triangle’ (Figure 2A, top left inset) for the Crc-Crc interaction. The single mutant proteins Crc<sub>R229E</sub>  
242 and Crc<sub>R230E</sub> did not affect translational repression of *amiE::lacZ*, whereas the function of the  
243 Crc<sub>E142R</sub> variant was diminished (Figure 2B), indicating that E142 can form salt bridges with either  
244 R229 or R230. The de-repression of *amiE::lacZ* observed with the Crc<sub>E142R</sub> variant was partially  
245 compensated by the double mutant proteins Crc<sub>E142R, R229E</sub> and Crc<sub>E142R, R230E</sub>. In addition, the  
246 Crc<sub>E142R</sub> and Crc<sub>R230E</sub> variants were impaired in Hfq:Crc:RNA complex formation as shown by the co-  
247 immunoprecipitation assay (Figure 2 – figure supplement 1A). Strikingly, the compensatory  
248 changes present in the triple mutant protein Crc<sub>E142R, R229E, R230E</sub> almost fully restored translational  
249 repression of the *amiE::lacZ* reporter gene. As the respective Crc variant proteins were produced  
250 at comparable levels (Figure 2 – figure supplement 1B), these mutational studies support the *in*  
251 *vivo* role for the interactions of the Crc protomers observed in the cryo-EM models.

252

### 253 ***Function, origins and validation of subunit cooperativity in the 2:4:2 complex***

254 The protomer interactions of the 2:2:2 assembly are highly interdependent, and once the core  
255 complex is generated it can recruit additional Crc molecules, forming the 2:3:2 and 2:4:2 complexes.  
256 In the 2:4:2 complex, a second type of Crc dimer seems to assemble with a smaller buried surface  
257 (Figure 3A). Such additional dimers can only form when an intact 2:2:2 core complex is present, as  
258 they are not observed in the core complex itself nor in solution or through crystallographic  
259 symmetry (Milojevic et al., 2013). Notably, the additional dimer is a more ‘open’ conformation of  
260 the crystallographic Crc dimer in the core, which is further supported by normal mode analysis (data  
261 not shown). The same key Crc dimer interface is occupied but seems to serve as a dynamic hinge,  
262 whereas the secondary, smaller, dimer interface between the Crc helices is absent to allow the new  
263 Crc dimer to adopt an ‘open’ conformation. Arg230 is reorganised by Glu193 in the same protomer



264 to self-interact with the corresponding Arg230 in the partner Crc, rather than with Glu142  
 265 (Supplementary movie 1). Additional hydrogen bonds are formed between Arg233 and Glu193,  
 266 whereas Arg229 is no longer part of the dimer interface (Figure 3A). Both Arg230 and Glu193 seem  
 267 to play pivotal roles in providing the structural freedom to form a dynamic hinge (Figure 3C).

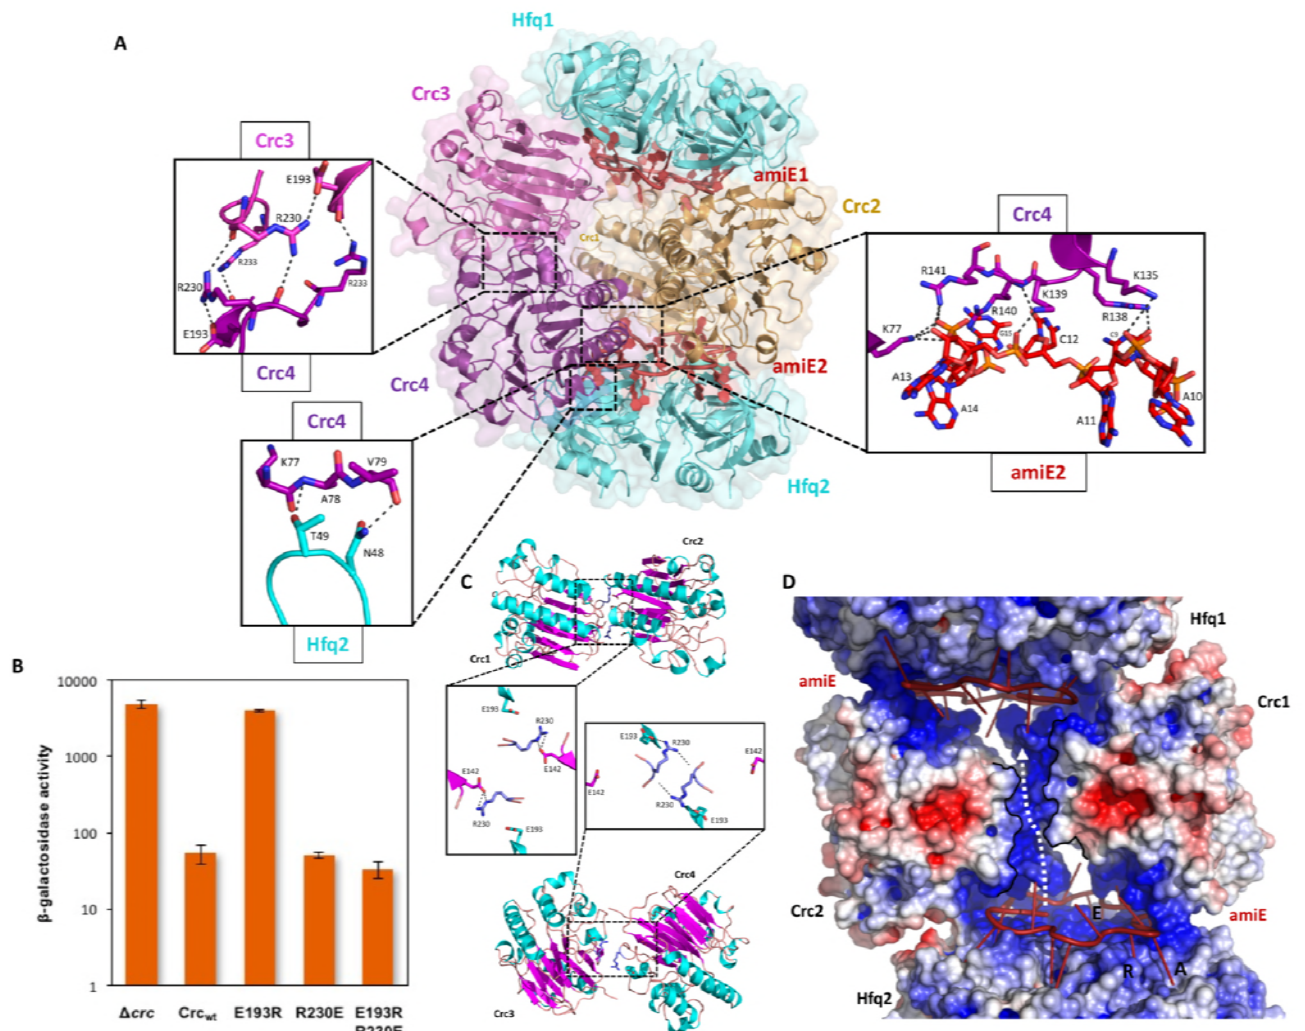

268  
 269 **Figure 3.** Model of the 2:4:2 Hfq:Crc:RNA complex and validation of interactions. A. Atomic model  
 270 of the 2:4:2 Hfq:Crc:RNA complex. The insets show additional Hfq-Crc, Crc-Crc and Crc-RNA  
 271 interactions not present in the 2:2:2 complex. The Crc3-4 dimer is formed by only one interface,  
 272 with an R230-R230 interaction at the core, which globally overlaps with the dimer interface of the  
 273 Crc1-Crc2 dimer (top left inset). Only one of two RNA binding patches is presented to *amiE*<sub>6ARN</sub> in  
 274 the Crc3-4 dimer, yet exploited more extensively (right inset). A small interface is formed between  
 275 Crc3-4 and Hfq. Crc dimer in yellow, *amiE*<sub>6ARN</sub> RNA in red, Hfq hexamers in cyan, extra Crc dimer in  
 276 magenta and purple. B. Translational repression of the *amiE::lacZ* reporter gene by Crc variants,  
 277 as described in Figure 2B. The results represent data from two independent experiments and are  
 278 shown as mean and range. C. Two dimeric Crc species are observed over the three complexes solved  
 279 by cryoEM. i: The self-complementary interaction of the 2:2:2 complex. ii: In the 2:4:2 complex,  
 280 an alternative dimer is formed, showing a twisted dimer interface and more open configuration, with  
 281 Arg230 serving as a dynamic hinge (bottom). D. An electropositive half-channel runs along the dimer



282 interface of the Crc1-2 dimer, and in the context of the Hfq/Crc/RNA assembly it could potentially  
283 serve as a conduit for RNA (dotted white arrow). The A, R, and E sites are annotated.  
284

285         Only the Arg233-Glu193 interaction is unique for the 2:4:2 assembly and was assessed *in*  
286  *vivo*. Strikingly, Crc<sub>E193R</sub> fully abrogated repression of the *amiE:LacZ* reporter gene (Figure 3B). The  
287 model predicts that the deleterious Crc<sub>E193R</sub> mutation can be compensated by the substitution of  
288 Crc<sub>R230E</sub> to re-establish the interaction. This pair does indeed behave as predicted, further confirming  
289 the *in vivo* importance of the 2:4:2 assembly during CCR (Figure 3B). By reorganising the extra Crc  
290 molecules 3 and 4 that bid the 2:2:2 core (Figure 3A), the alternative Crc dimer is able to utilise one  
291 of two basic patches on its surface when engaging *amiE*<sub>6ARN</sub> without causing steric hindrance to the  
292 already bound crystallographic dimer.

293         In addition to Crc Arg140 and Arg141, Crc K139  $\zeta$ -NH<sub>2</sub> makes a hydrogen bond with the OP<sub>2</sub>-  
294 group of A12, Arg138  $\eta^1$ -NH<sub>2</sub> interacts with the ribose hydroxyl group of C9 and K135  $\zeta$ -NH<sub>2</sub> forms  
295 a hydrogen bond with the A11 OP<sub>2</sub>. Finally, the O2 of cytosine C12 engages in a hydrogen bond with  
296 the backbone amino group of Arg140. Direct interactions between the reorganised Crc dimer and  
297 Hfq are limited to the same Crc  $\beta$ -strand and exposed loop of a sole Hfq monomer, as in the core  
298 complex. Due to the open conformation of the alternative Crc dimer, the Hfq Thr49 hydroxyl group  
299 now forms a hydrogen bond with the Ala 78 amide group (Figure 3A).

300         Interestingly, a basic half-channel is formed over the core dimer interface, with additional  
301 basic patches spread over the RNA binding surface of the Crc dimer (Figure 3D). Speculatively, longer  
302 RNA species could travel through the surface exposed half-channel and interconnect all components  
303 of the core complex into a highly organised assembly on this target RNA.

304  
305 ***A specialised and recurring RNA conformation in Hfq-mediated regulation***

306 Link et al. (2009) described the crystal structure of *E. coli* Hfq bound to a polyriboadenylate 18-mer  
307 and observed that the RNA encircled the distal face of the Hfq hexamer *via* a repetitive tripartite

308 binding scheme. Each base triplet is partially embedded between adjacent Hfq monomers and is  
309 mostly surface exposed, folding into a ‘crown-like’ conformation. We observe striking similarities  
310 with the fold of the authentic *amiE*<sub>6ARN</sub> species on the distal side of the *P. aeruginosa* Hfq hexamer  
311 (Figure 4). Notably, the cryoEM maps were calculated without any reference to the Link et al. (2009)  
312 structure. The agreement between the co-crystal structure of the homologous complex and the  
313 entirely independently derived cryoEM based model is a strong validation of both experimental  
314 procedures, X-ray crystallography and cryoEM. A recent study proposed an RNA-RNA stacking  
315 interface between two RNA species presented by Hfq, supported by crystal structures and  
316 biophysical analysis in solution (Schulz et al., 2017). Although all components necessary for such  
317 interaction are present in our reaction mixture, we do not observe such dimeric species by cryo-EM  
318 or in solution when Crc is present.

319         Like its *E. coli* homologue, *Pseudomonas* Hfq contains 6 tripartite binding pockets on the  
320 distal side, capable of binding a total of 18 nucleotides. Each of the six RNA triplets of the *amiE*<sub>6ARN</sub>  
321 RNA fits into an inter-subunit cleft in Hfq (Figure 4). The specific, star-shaped RNA fold is guided by  
322 six positively charged protuberances on the distal face of Hfq, with the phosphate backbone  
323 circularly weaving in between these, seemingly to minimise steric hindrance while maximizing  
324 surface interactions (Figure 4). As described by Link et al. (2009), each pocket consists of an  
325 adenosine specificity site (A), a purine nucleotide specificity site (R), and a presumed RNA  
326 entrance/exit site (E) which is non-discriminatory. Hfq thus has a structural preference for (ARN)<sub>n</sub>  
327 RNA stretches on its distal side, where N is any nucleotide. The adenosine specificity (A) sites are  
328 organised identically to the corresponding A sites in *E. coli* Hfq, forming hydrogen bonds between  
329 the peptide backbone and carboxyl-groups of Gln33 and the N6,7 atoms of the adenosine base, and  
330 a polar interaction between Gln52 (N<sub>E</sub>) and the N1 atom of the adenosine base. The peptide  
331 backbone amide of residue Lys31 interacts with the 5’ phosphate group of adenine. Finally, the  
332 adenine base is stacked against the side chain of Leu32 (Figure 4). The purine (R) specificity site is

333 defined by two neighbouring monomers, where the side chains from Tyr25 and from Leu26', Ile30'  
334 and Leu32' (where the prime denotes residues from a neighbouring subunit) contact the nucleotide  
335 aromatic base. In *amiE*<sub>6ARN</sub>, one R-site is populated by a guanine, forming a hydrogen bond between  
336 the N<sub>ε</sub> of Gln52' and the guanine exocyclic O6 (Figure 4). Just like in the *E. coli* Hfq/polyA<sub>18</sub> structure  
337 (Link et al., 2009), Gln52' forms a physical link between the A and R sites. Previous structures were  
338 obtained from polyA RNA, whereas the structures presented here were solved with the authentic  
339 *amiE* Hfq recognition site. Interestingly, Thr61 O<sub>γ</sub> forms a double hydrogen bond with the N1 and  
340 the exocyclic N2 from the guanine base, which was not seen previously (Link et al., 2009) as all R-  
341 sites were occupied by adenine residues (Figure 4).

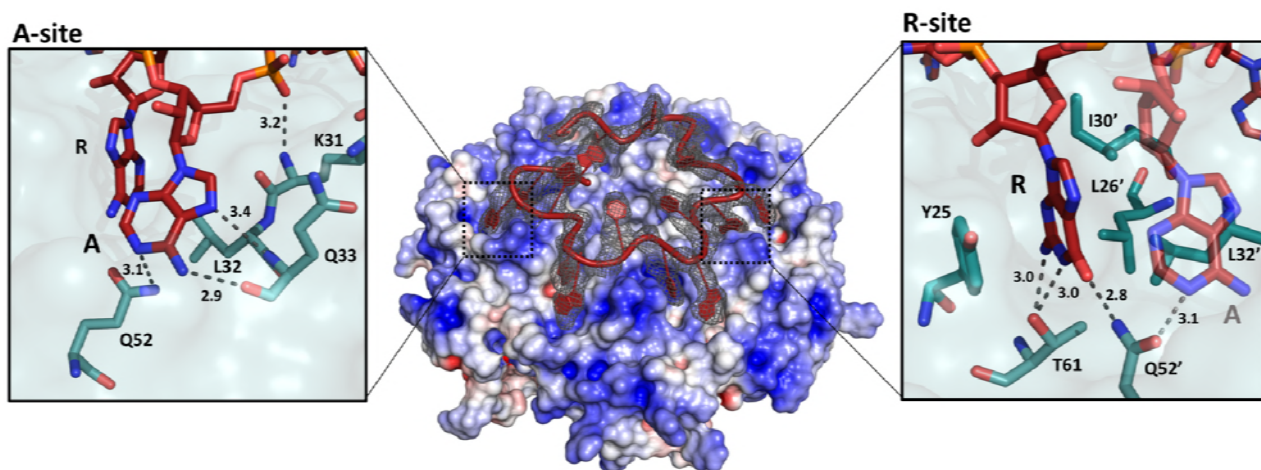

342

**Figure 4.** The 'A-R-N crown' in the Hfq/*amiE*<sub>6ARN</sub> RNA complex. 6 RNA triplets are partially embedded in 6 binding pockets on the Hfq distal side, forming a weaving, crown-like pattern. The A and R sites are occupied by adenine and a purine, respectively, whereas the RNA entry/exit site has no discriminatory preferences. Cryo-EM density for *amiE*<sub>6ARN</sub> is depicted as a grey mesh, with the RNA 'crown' modelled in red. Positively charged protuberances (blue) guide the RNA to fold into a star-shaped conformation to maximize the surface interaction between the negatively charged RNA backbone, and the positively charged Hfq surface pattern. An atomic model of the A-R-E occupation pattern. Left panel: Adenosine specificity site. Right panel: Purine specificity site. *amiE* nucleotide carbon atoms are depicted in red, Hfq carbon atoms are in green.

## 343 Discussion

344 Many functional studies have highlighted how global posttranscriptional regulators cooperate with  
345 each other and their RNA targets to control the fate of transcripts with high specificity. A major gap

346 in our current understanding has been the lack of high resolution structural data of these highly  
347 coordinated cellular processes. Here we report the first atomic model of Hfq interacting with a  
348 translational initiation region (*amiE*<sub>6ARN</sub>) and a partner protein to form a multi-component assembly  
349 that mediates translational control (Kambara et al., 2018; Sonnleitner et al., 2018). The RNA is a  
350 recurring A-rich fragment of *amiE* that occupies almost entirely the distal surface of Hfq, weaving in  
351 between basic, surface exposed islands. There are striking similarities to the structure of the polyA<sub>18</sub>  
352 complex with *E. coli* Hfq reported by Link et al. (2009), whose structure greatly added to the  
353 understanding of RNA binding and chaperone mechanisms, and hinted at how the distinct polyA  
354 RNA interaction might enable Hfq-mediated regulation. The polyA/Hfq structure revealed rules for  
355 recognition of motifs of the type A-R-N, where R is purine and N is any base. The *P. aeruginosa* Hfq  
356 interaction with *amiE*<sub>6ARN</sub> follows the same rules. The A-R-N repeat occurs in many RNAs, and it has  
357 been proposed that the exposed bases could mediate RNA to RNA interactions (Schulz et al., 2017).  
358 It is also a recurring motif in the nascent transcripts that are associated with Hfq and Crc in  
359 *Pseudomonas* (Kambara et al., 2018). We observe that the exposed bases (entry/exit site) and RNA  
360 backbone in the Hfq/*amiE*<sub>6ARN</sub> complex are available for interactions with Crc to form a cooperative  
361 assembly that efficiently mediates catabolite repression *in vivo* when the preferred carbon source  
362 is available (Figure 5).

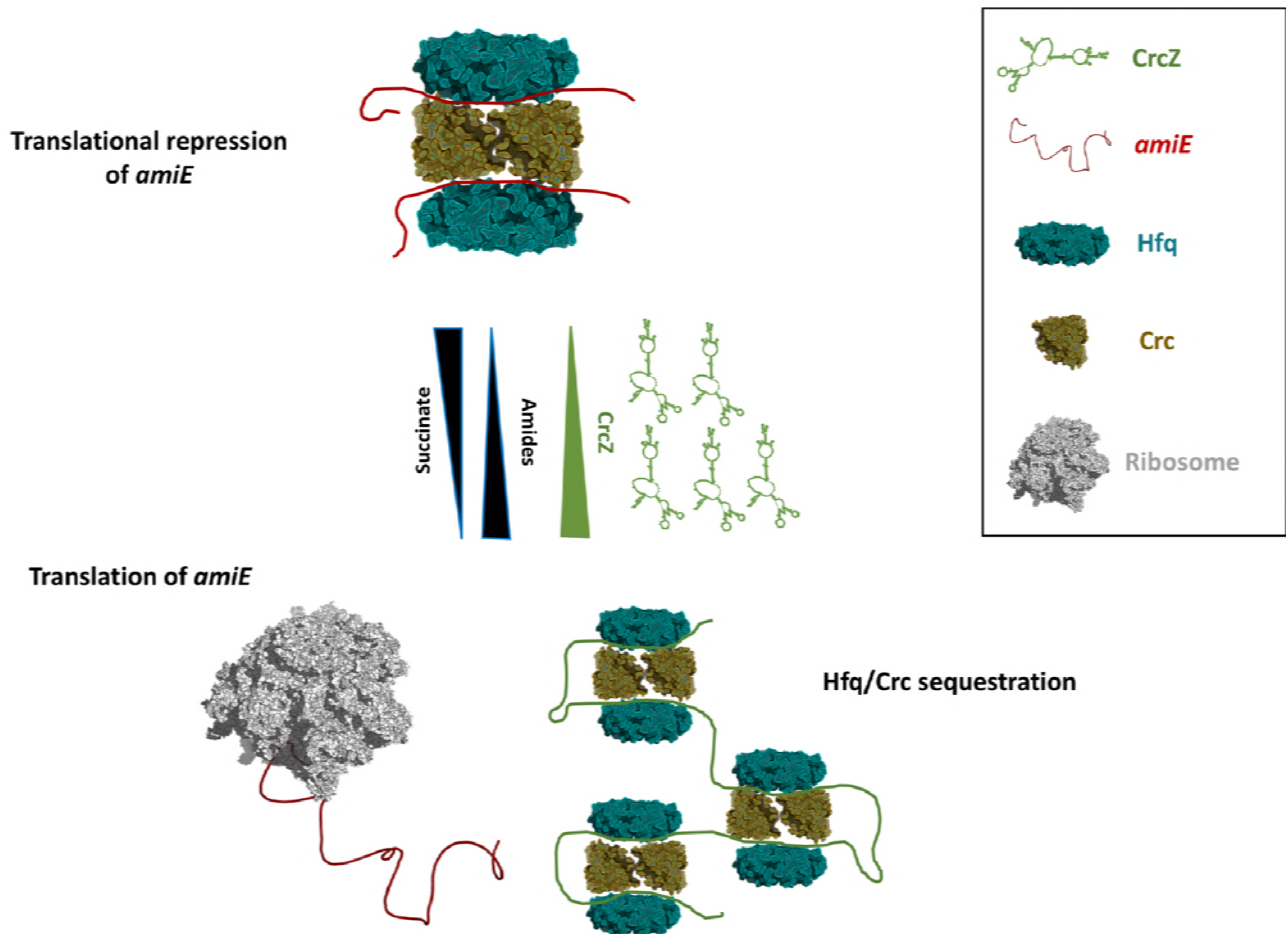

**Figure 5.** Schematic pathway of the Carbon Catabolite Repression. When the preferred carbon source, succinate, is abundant, cellular CrcZ levels are low and Hfq and Crc occlude the *amiE* ribosome binding site by forming a higher order assembly, rendering CCR active and repressing synthesis of aliphatic amidase (top). Upon depletion of succinate, CrcZ levels increase and sequesters Hfq and Crc from *amiE*, potentially by occupying the multiple ARN patches on CrcZ and forming multicomponent ‘beads on a string’. As such CCR is deactivated, allowing metabolism of a secondary carbon source, e.g. amide conversion by AmiE.

363

364 Previous studies have shown that both Hfq and Crc are required for tight translational  
365 repression of mRNAs, which are subject to carbon catabolite repression (CCR) (Sonnleitner and Bläsi,  
366 2014; Moreno et al., 2015). The presence of Crc did not significantly enhance the affinity of Hfq for  
367 *amiE*<sub>6ARN</sub> RNA (Sonnleitner et al., 2018). However, the simultaneous interactions of Crc with both  
368 binding partners resulted in an Hfq/Crc/RNA assembly with increased stability when compared with  
369 the Hfq/RNA complex alone (Sonnleitner et al., 2018). In light of our structural studies, the  
370 enhancing effect of Crc in Hfq-mediated translational repression of target mRNAs during CCR  
371 (Sonnleitner and Bläsi, 2014; Moreno et al., 2015) can be readily explained by the interactions of



372 Crc with both binding partners. It also accounts for the observed decrease in the off-rate on the RNA  
373 substrate (Sonnleitner et al., 2018). It is conceivable that full repression is only achieved when  
374 *amiE<sub>6ARN</sub>* is masked entirely in the 2:4:2 complex, which is supported by our *in vivo* studies.

375 The question arises why a higher order assembly such as the 2:2:2 core is formed and not a  
376 simpler complex. The structural data indicate that the dimerization of Crc provides the key step for  
377 formation of the 2:2:2 complex, because it will pre-organise a copy of the surface that interacts with  
378 the Hfq/RNA so that a second Hfq/RNA complex can be recruited. Thus, all components are  
379 necessary to form the complex so that there is no formation of lower order 'sub assemblies'. The  
380 structural data are consistent with Crc having no capacity for RNA binding by itself (Milojevic et al.,  
381 2013). The Hfq/Crc/RNA complex is thus assembled in a checklist-like manner through numerous  
382 small contacting surfaces and when the RNA target is presented by Hfq in a specific, well-defined  
383 configuration. In this way, the components interact mutually through chelate cooperative effects.  
384 Most likely the 2:2:2 core forms first, then the other Crc components are recruited.

385 We envisage that the 2:2:2 core and higher order assemblies might interact with other longer  
386 RNAs. The higher order assembly could capture two of such mRNA substrates (Figure 5), but chelate  
387 effects might instead induce formation of the complex on a single mRNA target. In that scenario, a  
388 portion of the mRNA would thread through the central basic half channel as depicted in Figure 3D.  
389 Under conditions of catabolite repression regulation, pull-down assays showed that Hfq and Crc  
390 form a co-complex in the presence of the 426nt long CrcZ RNA (Moreno et al., 2015; Sonnleitner et  
391 al., 2018). In the presence of less preferred carbon sources, the expression levels of CrcZ RNA  
392 increase (Sonnleitner et al., 2009) and CrcZ functions as an antagonist in Hfq/Crc mediated  
393 translational repression of catabolic genes. The CrcZ RNA has multiple ARN triplets that could be  
394 sites for Hfq/Crc interaction (Sonnleitner and Bläsi, 2014) that could sequester multiple Hfq/Crc  
395 proteins (Figure 5). Thus, under conditions where CCR is relieved, CrcZ RNA would serve as a sponge  
396 for Hfq/Crc to prevent repression of genes encoding proteins required for utilizing the less preferred

397 carbon sources (Figure 5). How the CrcZ RNA is displaced from Hfq/Crc remains unknown. However,  
398 the assemblies are likely to be dynamic and the displacement process might resemble that proposed  
399 for the step-wise exchange of sRNAs on Hfq (Fender et al., 2010). Recent findings show that the  
400 regulatory spectrum of Hfq and Crc is much broader than initially expected. Hfq was found to bind  
401 more than 600 nascent transcripts co-transcriptionally often in concert with Crc (Kambara et al.,  
402 2018). These findings indicate that Hfq and Crc together regulate gene expression post-  
403 transcriptionally beyond just catabolite repression.

404         Understanding how gene expression is regulated post-transcriptionally in pathogens such as  
405 *P. aeruginosa* may provide potential targets for novel drug design. Hfq and Crc are involved in key  
406 metabolic and virulence processes in *Pseudomonas* species (O'Toole et al. 2000; Sonnleitner et al.,  
407 2003; Sonnleitner et al., 2006; Linares et al., 2010; Huang et al., 2012; Zhang et al. 2012; Zhang et  
408 al., 2013; Sonnleitner and Bläsi, 2014; Pusic et al., 2016). Disrupting the interface of the core  
409 assembly of the Hfq/Crc complex might be one strategy to counter, among other, metabolic  
410 regulation and consequently its downstream processes that impact on virulence during infection. A  
411 recent study showed how overproduction of the aliphatic amidase AmiE strongly reduced biofilm  
412 formation and almost fully attenuated virulence in, amongst others, a mouse model of acute lung  
413 infection (Clamens et al., 2017). Novel drugs that specifically counteract Hfq:Crc:*amiE* assembly  
414 formation and prevent repression of AmiE production could induce the phenotype described by  
415 Clamens et al (2017). The high resolution structures presented here provide a starting point for  
416 novel strategies to interfere with e.g. carbon regulation in a pathogenic bacterium for therapeutic  
417 intervention of threatening infections.

418

419

#### 420 **Acknowledgements**

421 The coordinates and cryoEM maps have been deposited in the PDB and the EMBD. BFL, YYP and TD

422 are supported by the Wellcome Trust (200873/Z/16/Z). TD is also supported by an AstraZeneca  
423 Studentship. U.B. and E.S. are supported by the Austrian Science Fund (FWF) ([www.fwf.ac.at/en](http://www.fwf.ac.at/en))  
424 [P28711-B22]. We thank our colleagues Jamie Blaza, Dima Chirgadze, Jiri Sponer, Miroslav Kreply,  
425 Kasia Bandyra, Steven Hardwick, Sjors Scheres, Joerg Vogel, Armin Resch and Nguyen Thi Bach Hue  
426 for advice, helpful discussions and support. For access and help at facilities, we thank Giuseppe  
427 Cannon and staff at the MRC-LMB EM Facility and Kasim Sader at Thermo Fisher Scientific Pharma  
428 CryoEM Facility, Nanoscience Centre of University of Cambridge.

429

## 430 REFERENCES

431

432 Afonine, P.V., Grosse-Kunstleve, R.W., Echols, N., Headd, J.J., Moriarty, N.W., Mustyakimov, M.,  
433 Terwilliger, T.C., Urzhumtsev, A., Zwart, P.H., and Adams, P.D. (2012). Towards automated  
434 crystallographic structure refinement with phenix.refine. *Acta Crystallogr. D Biol. Crystallogr.* *68*,  
435 352-367.

436

437 Bandyra, K.J., Sinha, D., Syrjanen, J., Luisi, B.F., and De Lay, N.R. (2016). The ribonuclease  
438 polynucleotide phosphorylase can interact with small regulatory RNAs in both protective and  
439 degradative modes. *RNA* *22*, 360–372.

440

441 Chen, S., McMullan, G., Faruqi, A.R., Murshudov, G.N., Short, J.M., Scheres, S.H.W., and Henderson,  
442 R. (2013). High-resolution noise substitution to measure overfitting and validate resolution in 3D  
443 structure determination by single particle electron cryomicroscopy. *Ultramicroscopy* *135*, 24–35.

444

445 Clamens, T., Rosay, T., Crépin, A., Grandjean, T., Kentache, T., Hardouin, J., Bortolotti, P., Neidig,  
446 A., Mooij, M., Hillion, M., Vieillard, J., Cosette, P., Overhage, J., O’Gara, F., Bouffartigues, E.,

- 447 Dufour, A., Chevalier, S., Guery, B., Cornelis, P., Feuilloley, M. and Lesouhaitier, O. (2017). The  
448 aliphatic amidase AmiE is involved in regulation of *Pseudomonas aeruginosa* virulence. *Scientific*  
449 *Reports*, 7(1).
- 450
- 451 Emsley, P., Lohkamp, B., Scott, W.G., and Cowtan, K. (2010). Features and development of Coot.  
452 *Acta Crystallogr. D Biol. Crystallogr.* 66, 486-501.
- 453 Fender, A., Elf, J., Hampel, K., Zimmermann, B., and Wagner, E.G. (2010). RNAs actively cycle on the  
454 Sm-like protein Hfq. *Genes Dev.* 24, 2621-2626.
- 455 Fernandez, L., Breidenstein, E.B., Taylor, P.K., Bains, M., de la Fuente-Nunez, C., Fang, Y., Foster, L.J.,  
456 and Hancock, R.E. (2016). Interconnection of post-transcriptional regulation: the RNA-binding  
457 protein Hfq is a novel target of the Lon protease in *Pseudomonas aeruginosa*. *Sci. Rep.* 6, 26811.
- 458
- 459 Heitzinger, D.A. (2016) Impact of Hfq on antibiotic susceptibility of *Pseudomonas aeruginosa*.  
460 Master Thesis, University of Vienna.
- 461
- 462 Holloway, B.W., Krishnapillai, V., and Morgan, A.F. (1979). Chromosomal genetics of *Pseudomonas*.  
463 *Microbiol. Rev.* 43, 73-102.
- 464
- 465 Huang, J., Sonnleitner, E., Ren, B., Xu, Y., and Haas, D. (2012). Catabolite repression control of  
466 pyocyanin biosynthesis at an intersection of primary and secondary metabolism in *Pseudomonas*  
467 *aeruginosa*. *Appl. Environ. Microbiol.* 78, 5016-5020.
- 468
- 469 Ikeda, Y., Yagi, M., Morita, T., and Aiba, H. (2011). Hfq binding at RhlB-recognition region of RNase  
470 E is crucial for the rapid degradation of target mRNAs mediated by sRNAs in *Escherichia coli*. *Mol.*  
471 *Microbiol.* 79, 419-432.

472

473 Kambara, T.K., Ramsey, K.M., and Dove, S.L. (2018). Pervasive targeting of nascent transcripts by  
474 Hfq. *Cell Reports* 23, 1543-1552.

475

476 Link, T.M., Valentin-Hansen, P., and Brennan, R.G. (2009). Structure of *Escherichia coli* Hfq bound to  
477 polyriboadenylate RNA. *Proc. Natl. Acad. Sci. U.S.A.* 106, 19292-19297.

478

479 Linares, J.F., Moreno, R., Fajardo, A., Martínez-Solano, L., Escalante, R, Rojo, F., and Martínez, J.L.  
480 (2010). The global regulator Crc modulates metabolism, susceptibility to antibiotics and virulence in  
481 *Pseudomonas aeruginosa*. *Environ. Microbiol.* 12, 3196-3212.

482

483 Lu, P., Wang, Y., Zhang, Y., Hu, Y., Thompson, K.M., and Chen, S. (2016). RpoS-dependent sRNA RgsA  
484 regulates Fis and AcpP in *Pseudomonas aeruginosa*. *Mol. Microbiol.* 102, 244–259.

485

486 Miller, J.H. (1972). *Experiments in Molecular Genetics*. (New York: Cold Spring Harbor Press)

487

488 Milojevic, T., Grishkovskaya, I., Sonnleitner, E., Djinovic-Carugo, K., and Bläsi U. (2013). The  
489 *Pseudomonas aeruginosa* catabolite repression control protein Crc is devoid of RNA binding activity.  
490 *PLoS One* 8, e64609.

491

492 Mohanty, B.K., Maples, V.F., and Kushner, S.R. (2004). The Sm-like protein Hfq regulates  
493 polyadenylation dependent mRNA decay in *Escherichia coli*. *Mol. Microbiol.* 54, 905–920.

494

495 Moreno, R., Hernandez-Arranz, S., La Rosa, R., Yuste, L., Madhushani, A., Shingler, V., and Rojo,F.  
496 (2015). The Crc and Hfq proteins of *Pseudomonas putida* cooperate in catabolite repression and



497 formation of ribonucleic acid complexes with specific target motifs. *Environ. Microbiol.* *17*, 105-118.  
498  
499 Murshudov, G.N., Skubák, P., Lebedev, A.A., Pannu, N.S., Steiner, R.A., Nicholls, R.A., Vagin, A.A.  
500 (2011). REFMAC5 for the refinement of macromolecular crystal structures. *Acta Crystallogr. D Biol.*  
501 *Crystallogr.* *67*, 355–367.  
502  
503 O'Toole, G.A., Gibbs, K.A., Hager, P.W., Phibbs, P.V.Jr., and Kolter, R. (2000). The global carbon  
504 metabolism regulator Crc is a component of a signal transduction pathway required for biofilm  
505 development by *Pseudomonas aeruginosa*. *J. Bacteriol.* *182*, 425-431.  
506  
507 Panja, S., Schu, D.J., and Woodson, S.A. (2013). Conserved arginines on the rim of Hfq catalyze base  
508 pair formation and exchange. *Nucleic Acids Res.* *41*, 7536-7546.  
509  
510 Pantelic, R.S., Meyer, J.C., Kaiser, U., Baumeister, W., and Plitzko, J.M. (2010). Graphene oxide: a  
511 substrate for optimizing preparations of frozen-hydrated sample. *J. Structural Biol.* *170*, 152-156.  
512  
513 Pettersen, E.F., Goddard, T.D., Huang, C.C., Couch, G.S., Greenblatt, D.M., Meng, E.C., and Ferrin,  
514 T.E. (2004). UCSF Chimera - a visualization system for exploratory research and analysis. *J. Comput.*  
515 *Chem.* *25*, 1605-1612.  
516  
517 Punjuani, A., Rubinstein, J.L., Fleet, D.J., and Brubaker, M.A. (2017). cryoSPARC: algorithms for rapid  
518 unsupervised cryo-EM structure determination. *Nat. Methods* *14*, 290-296.  
519  
520 Pusic, P., Tata, M., Wolfinger, M.T., Sonnleitner, E., Häussler, S. and Bläsi, U. (2016). Cross-regulation  
521 by CrcZ RNA controls anoxic biofilm formation in *Pseudomonas aeruginosa*. *Sci. Rep.* *6*, 39621.

- 520 Resch, A., Večerek, B., Palavra, K. and Bläsi, U. (2010). Requirement of the CsdA DEAD-box helicase  
521 for low temperature riboregulation of *rpoS* mRNA. *RNA Biol.* *7*, 796–802.  
522
- 523 Rojo, F. (2010). Carbon catabolite repression in *Pseudomonas*: optimizing metabolic versatility and  
524 interactions with the environment. *FEMS Microbiol. Rev.* *34*, 658–684.  
525
- 526 Santiago-Frangos, A., Jeliaskov, J.R., Gray, J.J., and Woodson, S.A. (2017). Acidic C-terminal domains  
527 autoregulate the RNA chaperone Hfq. *Elife* *6*, e27049.  
528
- 529 Santiago-Frangos, A., Kavita, K., Schu, D. J., Gottesman, S., and Woodson, S. A. (2016). C-terminal  
530 domain of the RNA chaperone Hfq drives sRNA competition and release of target RNA. *Proc. Natl.*  
531 *Acad. Sci. U.S.A.* *113*, E6089–E6096.  
532
- 533 Sauer, E., Schmidt, S., and Weichenrieder, O. (2012). Small RNA binding to the lateral surface of Hfq  
534 hexamers and structural rearrangements upon mRNA target recognition. *Proc. Natl. Acad. Sci. U.S.A.*  
535 *109*, 9396-9401.  
536
- 537 Scheres, S.H. (2012). A Bayesian view on cryo-EM structure determination. *J. Mol. Biol.* *415*, 406-  
538 418.  
539
- 540 Scheres, S.H., and Chen, S. (2012). Prevention of overfitting in cryo-EM structure determination *Nat.*  
541 *Methods* *9*, 853–854.  
542
- 543 Schulz, E.C., Seiler, M., Zuliani, C., Voight, F., Rybin, V., Pogenberg, V., Mucke, N., Wilmanns, M.,  
544 Gibson, T.J. and Barabas, O. (2017). Intermolecular base stacking mediates RNA-RNA interaction in

- 545 a crystal structure of the RNA chaperone Hfq. *Sci. Rep.* 7, 9903.
- 546
- 547 Schumacher, M.A., Pearson, R.F., Møller, T., Valentin-Hansen, P., and Brennan, R.G.(2002).
- 548 Structures of the pleiotropic translational regulator Hfq and an Hfq-RNA complex: a bacterial Sm-
- 549 like protein. *EMBO J.* 21, 3546-3556.
- 550
- 551 Sonnleitner, E., Abdou, L., and Haas, D. (2009). Small RNA as global regulator of carbon catabolite
- 552 repression in *Pseudomonas aeruginosa*. *Proc. Natl. Acad. Sci. U.S.A.* 106, 21866–21871.
- 553
- 554 Sonnleitner, E., and Bläsi, U. (2014). Regulation of Hfq by the RNA CrcZ in *Pseudomonas aeruginosa*
- 555 carbon catabolite repression. *PLoS Genet.* 10, e1004440.
- 556
- 557 Sonnleitner, E., Hagens, S., Rosenau, F., Wilhelm, S., Habel, A., Jäger, K.E., and Bläsi, U. (2003)
- 558 Reduced virulence of a *hfq* mutant of *Pseudomonas aeruginosa* O1. *Microb. Pathog.* 35, 217–228.
- 559
- 560 Sonnleitner, E., Schuster, M., Sorger-Domenigg, T., Greenberg, E.P., and Bläsi, U. (2006). Hfq-
- 561 dependent alterations of the transcriptome profile and effects on quorum sensing in *Pseudomonas*
- 562 *aeruginosa*. *Mol. Microbiol.* 59, 1542–1558.
- 563
- 564 Sonnleitner, E., Wulf, A., Campagne, S., Pei, X., Wolfinger, M., Forlani, G., Prindl, K., Abdou, L.,
- 565 Resch, A., Allain, F., Luisi, B., Urlaub, H. and Bläsi, U. (2017). Interplay between the catabolite
- 566 repression control protein Crc, Hfq and RNA in Hfq-dependent translational regulation in
- 567 *Pseudomonas aeruginosa*. *Nucleic Acids Research*, 46(3), pp.1470-1485.
- 568
- 569 Sukhodolets, M.V., and Garges, S. (2003). Interaction of *Escherichia coli* RNA polymerase with the

570 ribosomal protein S1 and the Sm-like ATPase Hfq. *Biochemistry* 42, 8022–8034.

571

572 Valentini, M., Garcia-Maurino, S.M., Perez-Martinez, I., Santero, E., Canosa, I., and Lapouge, K.

573 (2014). Hierarchical management of carbon sources is regulated similarly by the CbrA/B

574 systems in *Pseudomonas aeruginosa* and *Pseudomonas putida*. *Microbiology* 160, 2243-2252.

575

576 Van den Bossche, A., Ceysens, P., De Smet, J., Hendrix, H., Bellon, H., Leimer, N., Wagemans, J.,

577 Delattre, A., Cenens, W., Aertsen, A., Landuyt, B., Minakhin, L., Severinov, K., Noben, J. and

578 Lavigne, R. (2014). Systematic Identification of Hypothetical Bacteriophage Proteins Targeting Key

579 Protein Complexes of *Pseudomonas aeruginosa*. *Journal of Proteome Research*, 13(10), pp.4446-

580 4456.

581

582 Večerek, B., Beich-Frandsen, M., Resch, A., and Bläsi, U. (2010). Translational activation of *rpoS*

583 mRNA by the non-coding RNA DsrA and Hfq does not require ribosome binding. *Nucleic Acids Res.*

584 38, 1284–1293.

585

586 Vogel, J., and Luisi, B.F. (2011). Hfq and its constellation of RNA. *Nat. Rev. Microbiol.* 9, 578-589.

587

588 Wagner, E.G., and Romby, P. (2015). Small RNAs in bacteria and archaea: who they are, what they

589 do, and how they do it. *Adv. Genet.* 90, 133–208.

590

591 Williams, C., Headd, J., Moriarty, N., Prisant, M., Videau, L., Deis, L., Verma, V., Keedy, D., Hintze,

592 B., Chen, V., Jain, S., Lewis, S., Arendall, W., Snoeyink, J., Adams, P., Lovell, S., Richardson, J. and

593 Richardson, D. (2017). MolProbity: More and better reference data for improved all-atom

594 structure validation. *Protein Science*, 27(1), pp.293-315.

595

596 Worrall, J.A., Gorna, M., Crump, N.T., Phillips, L.G., Tuck, A.C., Price, A.J., Bavro, V.N., and Luisi, B.F.  
597 (2008). Reconstitution and analysis of the multienzyme *Escherichia coli* RNA degradosome. *J. Mol.*  
598 *Biol.* **382**, 870–883.

599

600 Yang, N., Ding, S., Chen, F., Zhang, X., Xia, Y., Di, H., Cao, Q., Deng, X., Wu, M., Wong, C., Tian, X.,  
601 Yang, C., Zhao, J. and Lan, L. (2015). The Crc protein participates in down-regulation of the Lon  
602 gene to promote rhamnolipid production and quorum sensing in *Pseudomonas*  
603 *aeruginosa*. *Molecular Microbiology*, **96**(3), pp.526-547.

604

605 Zhang, K. (2016). Gctf: real-time CTF determination and correction. *J. Struct. Biol.* **193**, 1-12.

606

607 Zhang, L., Chiang, W.C., Gao, Q., Givskov, M., Tolker-Nielsen, T., Yang, L., and Zhang, G. (2012). The  
608 catabolite repression control protein Crc plays a role in the development of antimicrobial-tolerant  
609 subpopulations in *Pseudomonas aeruginosa* biofilms. *Microbiology* **158**, 3014–3019.

610

611 Zhang, L., Gao, Q., Chen, W., Qin, H., Hengzhuang, W., Chen, Y., Yang, L., and Zhang, G. (2013).  
612 Regulation of *pqs* quorum sensing via catabolite repression control in *Pseudomonas aeruginosa*.  
613 *Microbiology* **159**, 1931–1936.

614

615 Zheng, S.Q., Palovcak, E., Armache, J.-P., Cheng, Y. and Agard, D.A. (2017). MotionCor2: anisotropic  
616 correction of beam-induced motion for improved cryo-electron microscopy. *Nat. Methods* **14**, 331-  
617 332.

618



619

620

621

622

623

624

625

626

## 627 MATERIALS AND METHODS

### 628 *Protein synthesis, purification and complex formation*

629 *P. aeruginosa* Hfq and Crc were produced in *E. coli* and purified as described by Sonnleitner et al.  
630 (2018). The synthetic 18-mer *amiE*<sub>6ARN</sub> RNA (5'-AAAAUAACAACAAGAGG-3') used in these studies  
631 consists of six tripartite binding motifs (Sonnleitner and Bläsi, 2014). The Hfq/ Crc/ RNA complex  
632 was prepared by first heating the *amiE*<sub>6ARN</sub> RNA at 95°C for 5 minutes followed by 50°C for 10  
633 minutes and 37°C for 10 minutes. The RNA was then incubated with the Hfq hexamer at a 1:1 molar  
634 ratio on ice for 20 minutes to form a binary complex, then an equal molar ratio of Crc was added.  
635 The mixture was incubated on ice for 30 minutes prior to fractionation by size exclusion  
636 chromatography using a Superdex 200 column equilibrated in running buffer composed of 20 mM  
637 HEPES, pH 7.9, 10 mM KCl, 40 mM NaCl, 1 mM MgCl<sub>2</sub>, and 2 mM TCEP (tris(2-  
638 carboxyethyl)phosphine). The peak fractions were buffer exchanged into 20 mM HEPES, pH 7.9, 10  
639 mM KCl, 40 mM NaCl, 5 mM MgCl<sub>2</sub>. Samples used for cross-linking were incubated with  
640 bis(sulfosuccinimidyl)suberate (BS<sup>3</sup>) at 150 μM for 30 minutes on ice, followed by quenching at 37.5  
641 mM Tris-HCl pH 8.0.

642

### 643 *CryoEM specimen preparation and data acquisition*

644 Graphene oxide grids are prepared as described by Pantelic et al. (2010). Briefly, 2 mg/ml of  
645 graphene oxide solution in water (Aldrich) was diluted ten times in water. After removing  
646 aggregation by spinning for 30 seconds at 300 rcf, 2 μl of graphene oxide solution was loaded on  
647 freshly glow discharged quantifoil Au-grids (R1.2/1.3, 300 mesh). Glow discharge was performed  
648 prior to graphene oxide coating at 45 mA for 60 second with an Edward Sputter Coater S150B at  
649 0.2m Bar at 0.75 KV. After the graphene oxide had been adsorbed for 1 minute, the grids were  
650 washed 3 times with 20 μl water, then air-dried for 1 hour at room temperature prior to sample  
651 application. Specimens for cryoEM analysis were prepared by applying 2 μl of a 0.65 μM solution of

652 the Hfq/Crc/RNA complex to the Quantifoil Au grids freshly coated with graphene oxide. After an  
653 adsorption time of 60s, the grids were blotted for 10 seconds at a blot force of 5, then plunge frozen  
654 into liquid ethane using a Vitrobot (FEI). Images were recorded on a Krios G2, Falcon III direct  
655 electron detector at 300 kV operating in counting mode (Supplementary Table 3).

656

#### 657 *Movie processing, single particle analysis, 3D reconstruction and refinement*

658 Whole frame motion correction was performed on movies with motioncorr2 with dose weighting  
659 followed by CTF estimation using gctf (Zhang, 2016; Zheng et al., 2017). RELION-2.1 was used for  
660 data processing (Scheres, 2012). Final resolution estimates were calculated after the application of  
661 a soft binary mask and phase randomisation and determined based on the gold standard FSC=0.143  
662 criterion (Scheres and Chen, 2012; Chen et al., 2013).

663 For the BS<sup>3</sup> treated complex, after manually picking 3159 particles and using suitable  
664 references for autopicking, 482426 particles were used for early classifications. After three rounds  
665 of rejecting particles by 2D classification, 215774 particles were used for initial model generation  
666 and 3D classification. An initial model was generated using an SGD algorithm based on a small subset  
667 of particles with diverse orientations (Punjani et al., 2017). During 3D classification, three different  
668 complexes were resolved after 25 iterations with an angular sampling of 7.5°: 2Hfq:2Crc:2amiE<sub>GARN</sub>  
669 (2:2:2), 2Hfq:3Crc:2amiE<sub>GARN</sub> (2:3:2) and 2Hfq:4Crc:2amiE<sub>GARN</sub> (2:4:2). To properly separate, validate  
670 and refine the 3 classes, the same 3D classification was rerun with the new 2:3:2 model as reference  
671 model, lowpass filtered to 20 Å resolution. C2 symmetry was observed and imposed for the 2:2:2  
672 and 2:4:2 complexes. Each of the classes was then refined to sub-3.5 Å resolution, followed by per-  
673 particle frame alignment for movement correction and per-frame damage weighting. The resulting  
674 'polished' particles were subjected to a final refinement round with solvent flattening. All reference  
675 models were lowpass filtered to 60 Å prior to refinement. The dominant class (2:2:2) had a  
676 resolution of 3.12 Å. Local resolution calculations were done with the relion local resolution

677 estimator (Supplementary Figures 1 and 2A, Supplementary Table 1).

678           Crystal structures for *P. aeruginosa* Crc (PDB code 1U1S) and Hfq (PDB code 4JG3) were  
679 manually docked into the EM density map as rigid bodies in Chimera (Pettersen et al., 2004). The  
680 RNA 18-mers were manually built into the density using Coot (Emsley et al., 2010). Refmac5 and  
681 Phenix real-space refinement with global energy minimization, NCS-restraints, group B-factor and  
682 geometry restraints were used to iteratively refine the multi-subunit complexes at high resolution,  
683 followed by manual corrections for Ramachandran and geometric outliers in Coot (Supplementary  
684 Table 1) (Emsley et al., 2010; Murshudov et al., 2011; Afonine et al., 2012). Model quality was  
685 evaluated with Procheck in CCP4 and MolProbity (Williams et al., 2018). *In silico* 2 Å maps were  
686 generated from the atomic models and FSC validation against the experimental maps was  
687 performed with the EMDb Fourier shell correlation server (EMBL-EBI) (Figure 1 – figure supplement  
688 2 B).

689

#### 690 *Bacterial strains and plasmids*

691 The strains, plasmids and oligonucleotides used in this study are listed in Supplementary Tables S2  
692 and S3.

693

#### 694 *Construction of plasmids encoding Crc variant proteins for in vivo translational repression assay*

695 To test the proficiency of Crc mutant proteins to co-repress translation of a translational *amiE:lacZ*  
696 reporter gene, derivatives of plasmid pME4510 $cr_{C_{Flag}}$  (Supplementary Table S2) were constructed  
697 by means of Quick change site directed mutagenesis (Agilent Technologies). Plasmid pME4510 $cr_{C_{Flag}}$   
698 was used together with the corresponding mutagenic oligonucleotide pairs (Supplementary Table  
699 S3). The parental plasmid templates were digested with *DpnI* and the mutated nicked circular  
700 strands were transformed into *E. coli* XL1-Blue, generating plasmids pME4510 $cr_{C_{(R140E)Flag}}$ ,  
701 pME4510 $cr_{C_{(E142R)Flag}}$ , pME4510 $cr_{C_{(R229E)Flag}}$ , pME4510 $cr_{C_{(E193R)Flag}}$ , pME4510 $cr_{C_{(R230E)Flag}}$ ,

702 pME4510crc<sub>(E142R, R229E)Flag</sub>, pME4510crc<sub>(E193R, R230E)Flag</sub>, pME4510crc<sub>(E142R, R230E)Flag</sub> and  
703 pME4510crc<sub>(E142R, R229E, R230E)Flag</sub>.

704

705 *In vivo translational repression of an amiE::lacZ reporter gene in the presence of Crc variants*

706 The ability of the Crc mutant proteins to repress translation of an *amiE::lacZ* reporter gene was  
707 tested in a PAO1 *crc* deletion strain bearing plasmids encoding the wt protein or the respective  
708 protein variants (Supplementary Table S2) as described by Sonnleitner et al. (2018). The  $\beta$ -  
709 galactosidase activities were determined as described (Miller, 1972). The  $\beta$ -galactosidase units in  
710 the different experiments were derived from two independent experiments.

711

712 *Construction of plasmids employed for the production of selected Crc mutant proteins*

713 The R140E, E142R, R230E single aa exchanges in Crc were obtained by using the QuickChange site-  
714 directed mutagenesis protocol (Agilent Technologies). The plasmid pETM14lic-His<sub>6</sub>Crc  
715 (Supplementary Table S2) was used together with the corresponding mutagenic oligonucleotide  
716 pairs (Supplementary Table S3). The entire plasmids were amplified with Pfu DNA polymerase  
717 (Thermo Scientific). The parental plasmid templates were digested with *DpnI* and the mutated  
718 nicked circular strands were transformed into *E. coli* XL1-Blue, generating plasmids pETM14lic-  
719 His<sub>6</sub>Crc<sub>R140E</sub>, pETM14lic-His<sub>6</sub>Crc<sub>E142R</sub> and pETM14lic-His<sub>6</sub>Crc<sub>R230E</sub>

720

721 *Purification of Crc and Crc variants*

722 The Crc protein and the Crc variants Crc<sub>R140E</sub>, Crc<sub>E142R</sub> and Crc<sub>R230E</sub> were purified from *E. coli* strain  
723 BL21(DE3) harboring either plasmid pETM14lic-His Crc or the respective derivatives using Ni-affinity  
724 chromatography, followed by removal of the His<sub>6</sub>-tag with GST-HRV14-3C “PreScission” protease as  
725 described by Milojevic et al. (2013).

726

727

728 *In vitro co-IP studies*

729 The co-IP studies in the presence of 40 pmol of Hfq-hexamer, 120 pmol of Crc protein or of the  
730 respective Crc mutant proteins and 40 pmol *amiE*<sub>6ARN</sub> RNA were performed as described  
731 (Sonnleitner et al., 2018).

732

733 *Western blot analyses*

734 Equal amounts of proteins were separated on 12% SDS-polyacrylamide gels, and then electro-  
735 blotted onto a nitrocellulose membrane. The blots were blocked with 5% dry milk in TBS buffer, and  
736 probed with rabbit anti-Hfq (Pineda) and rabbit anti-Crc (Pineda) antibodies, respectively. Immuno-  
737 detection of ribosomal protein S1 served as a loading control. The antibody-antigen complexes were  
738 visualized with alkaline-phosphatase conjugated secondary antibodies (Sigma) using the  
739 chromogenic substrates nitro blue tetrazolium chloride (NBT) and 5-Bromo-4-chloro-3-indolyl  
740 phosphate (BCIP).

741



742

743

744

745

746

747

748

749  
750  
751  
752  
753

754

755 **Supplementary Table S1.** Cryo-EM data collection and refinement statistics for Hfq/Crc/RNA

756 structures

|                                                 | BS <sup>3</sup> crosslinked |        |       | Native              |        |        |
|-------------------------------------------------|-----------------------------|--------|-------|---------------------|--------|--------|
| 757 PDB codes                                   | 6FUS,6FYN,6FXZ              |        |       |                     |        |        |
| 759 EMDDB codes                                 | 4320, 4326, 4325            |        |       |                     |        |        |
| 760                                             |                             |        |       |                     |        |        |
| 761 <b>Data collection</b>                      |                             |        |       |                     |        |        |
| 762 EM equipment                                | Titan Krios G2, FEI         |        |       | Titan Krios G2, FEI |        |        |
| 763 Voltage (kV)                                | 300                         |        |       | 300                 |        |        |
| 764 Detector                                    | Falcon III                  |        |       | Falcon III          |        |        |
| 765 Pixel size (Å)                              | 1.07                        |        |       | 1.09                |        |        |
| 766 Electron dose (e-/Å <sup>2</sup> /fraction) | 0.37                        |        |       | 0.40                |        |        |
| 767 Defocus range, step (µm)                    | -1.25 to -3, δ=0.25         |        |       | -1.25 to -3, δ=0.25 |        |        |
| 768                                             |                             |        |       |                     |        |        |
| 769 <b>Reconstruction</b>                       |                             |        |       |                     |        |        |
| 770 Software                                    | RELION v 2.1                |        |       | RELION v2.1         |        |        |
| 771 Complex (Hfq:Crc:RNA)                       | 2:2:2                       | 2:3:2  | 2:4:2 | 2:2:2               | 2:3:2  | 2:4:2  |
| 772 Molecular mass (kDa)                        | 192                         | 222    | 252   | 192                 | 222    | 252    |
| 773 Number of particles used                    | 57,660                      | 48,144 | 38,18 | 25,408              | 18,898 | 14,900 |
| 774 Angluar accuracies (°)                      | 0.82                        | 1.13   | 1.26  | 1.65                | 1.71   | 1.58   |
| 775 Offsets (pixels)                            | 0.361                       | 0.491  | 0.527 | 0.652               | 0.681  | 0.657  |
| 776 Symmetry.                                   | C2                          | C1     | C2    | C2                  | C1     | C2     |
| 777 Final resolution (Å)                        | 3.12                        | 3.27   | 3.27  | 4.42                | 4.5    | 4.43   |
| 778 Map-sharpening B factor (Å <sup>2</sup> )   | -109                        | -125   | -115  | -189                | -172   | -173   |
| 779 Non-hydrogen atoms                          | 11466                       | 13647  | 15770 | 11466               | 13647  | 15770  |
| 780 Protein residues                            | 1292                        | 1458   | 1820  | 1292                | 1558   | 1820   |
| 781 RNA bases                                   | 18                          | 18     | 18    | 18                  | 18     | 18     |
| 782                                             |                             |        |       |                     |        |        |
| 783 <b>Refinement</b>                           |                             |        |       |                     |        |        |
| 784 Software                                    | PhenixRSRef                 |        |       |                     |        |        |
| 785 Model-to-Map CorrelationCoef.               | 0.84                        | 0.81   | 0.81  |                     |        |        |
| 786                                             |                             |        |       |                     |        |        |
| 787                                             |                             |        |       |                     |        |        |
| 788 <b>Model Validation</b>                     |                             |        |       |                     |        |        |
| 789 MolProbity score                            | 1.73                        | 1.83   | 1.72  |                     |        |        |
| 790 EMRinger                                    | 3.8                         | 3.4    | 3.2   |                     |        |        |
| 791 All-atom clash score                        | 5.5                         | 7.2    | 6.1   |                     |        |        |
| 792                                             |                             |        |       |                     |        |        |
| 793 <b>Ramachandran statistics (%)</b>          |                             |        |       |                     |        |        |
| 794 Favored (overall)                           | 93.32                       | 93.3   | 94.4  |                     |        |        |
| 795 Allowed (overall)                           | 6.52                        | 6.7    | 5.6   |                     |        |        |
| 796 Outlier (overall)                           | 0.16                        | 0.0    | 0.0   |                     |        |        |
| 797 <b>R.m.s. deviations</b>                    |                             |        |       |                     |        |        |
| 798 Bond length (Å)                             | 0.008                       | 0.023  | 0.007 |                     |        |        |
| 799 Bond angle (°)                              | 0.89                        | 1.09   | 0.86  |                     |        |        |
| 800 <b>Validation (RNA)</b>                     |                             |        |       |                     |        |        |
| 801 Correct sugar puckers (%)                   | 89                          | 89     | 89    |                     |        |        |
| 802 Good backbone conformation (%)              | 39                          | 39     | 39    |                     |        |        |
| 803                                             |                             |        |       |                     |        |        |

804 **Supplementary Table S2. Strains and plasmids used in this study**

805  
806  
807

| Strain/plasmid                                          | Genotype/relevant features                                                                                                                       | Source/reference              |
|---------------------------------------------------------|--------------------------------------------------------------------------------------------------------------------------------------------------|-------------------------------|
| <b><i>P. aeruginosa</i></b>                             |                                                                                                                                                  |                               |
| PAO1                                                    |                                                                                                                                                  | (Holloway et al., 1979)       |
| PAO1Δ <i>crc</i>                                        | PAO6673, in frame deletion of <i>crc</i> deletion                                                                                                | (Sonnleitner and Bläsi, 2014) |
| <b><i>E. coli</i></b>                                   |                                                                                                                                                  |                               |
| XL1-Blue                                                | <i>recA1 endA1 gyrA96 thi-1 hsdR17(rK-, mK+) supE44 relA1 lac</i><br>[F' <i>proAB lacI<sup>q</sup> lacZΔM15::Tn10(Tc<sup>r</sup>)</i> ]          | Stratagene                    |
| BL21(DE3)                                               | <i>F, ompT, hsdS<sub>B</sub>(r<sub>B</sub><sup>-</sup>, m<sub>B</sub><sup>-</sup>), dcm, gal, λ(DE3)</i>                                         | Novagen                       |
| <b>Plasmids</b>                                         |                                                                                                                                                  |                               |
| pETM14lic-His <sub>6</sub> Crc                          | Encodes Crc with a N-terminal cleavable His <sub>6</sub> -tag. Transcription of the <i>crc</i> gene is driven by a T7 promoter. Kan <sup>R</sup> | (Milojevic et al., 2013)      |
| pME9655                                                 | Encoding the translational <i>amiE::lacZ</i> reporter gene. Tc <sup>r</sup>                                                                      | (Sonnleitner and Bläsi, 2014) |
| pME4510 <i>crc</i> <sub>Flag</sub>                      | pME4510 carrying PAO1 <i>crc</i> fused to a Flag-tag encoding sequence under control of its authentic promoter                                   | (Sonnleitner et al., 2018)    |
| pME4510 <i>crc</i> <sub>(R140E)Flag</sub>               | pME4510 <i>crc</i> <sub>Flag</sub> derivative encoding the Crc <sub>(R140E)</sub> variant                                                        | This study                    |
| pME4510 <i>crc</i> <sub>(E142R)Flag</sub>               | pME4510 <i>crc</i> <sub>Flag</sub> derivative encoding the Crc <sub>(E142R)</sub> variant                                                        | This study                    |
| pME4510 <i>crc</i> <sub>(R229E)Flag</sub>               | pME4510 <i>crc</i> <sub>Flag</sub> derivative encoding the Crc <sub>(R229E)</sub> variant                                                        | This study                    |
| pME4510 <i>crc</i> <sub>(R230E)Flag</sub>               | pME4510 <i>crc</i> <sub>Flag</sub> derivative encoding the Crc <sub>(R230E)</sub> variant                                                        | This study                    |
| pME4510 <i>crc</i> <sub>(E142R, R229E)Flag</sub>        | pME4510 <i>crc</i> <sub>Flag</sub> derivative encoding the Crc <sub>(E142R, R229E)</sub> variant                                                 | This study                    |
| pME4510 <i>crc</i> <sub>(E142R, R230E)Flag</sub>        | pME4510 <i>crc</i> <sub>Flag</sub> derivative encoding the Crc <sub>(E142R, R230E)</sub> variant                                                 | This study                    |
| pME4510 <i>crc</i> <sub>(E142R, R229E, R230E)Flag</sub> | pME4510 <i>crc</i> <sub>Flag</sub> derivative encoding the Crc <sub>(E142R, R229E, R230E)</sub> variant                                          | This study                    |
| pME4510 <i>crc</i> <sub>(E193R)Flag</sub>               | pME4510 <i>crc</i> <sub>Flag</sub> derivative encoding the Crc <sub>(E193R)</sub> variant                                                        | This study                    |
| pME4510 <i>crc</i> <sub>(E193R, R230E)Flag</sub>        | pME4510 <i>crc</i> <sub>Flag</sub> derivative encoding the Crc <sub>(E193R, R230E)</sub> variant                                                 | This study                    |
| pETM14lic-His <sub>6</sub> Crc <sub>R140E</sub>         | pETM14lic-His <sub>6</sub> Crc derivative encoding the Crc <sub>(R140E)</sub> variant                                                            | This study                    |
| pETM14lic-His <sub>6</sub> Crc <sub>E142R</sub>         | pETM14lic-His <sub>6</sub> Crc derivative encoding the Crc <sub>(E142R)</sub> variant                                                            | This study                    |
| pETM14lic-His <sub>6</sub> Crc <sub>R230E</sub>         | pETM14lic-His <sub>6</sub> Crc derivative encoding the Crc <sub>(R230E)</sub> variant                                                            | This study                    |

808  
809  
810  
811  
812  
813

**Supplementary Table S3. Oligonucleotides used in this study**

| Name | Sequence <sup>a</sup>        | Mutation/orientation                 |
|------|------------------------------|--------------------------------------|
| N142 | GCGTCGCAAGgaaCGCGAATACATC    | Crc <sub>R140E</sub> /forward        |
| O142 | GATGTATTCGcgttCCTTGCGACGC    | Crc <sub>R140E</sub> /reverse        |
| P142 | CAAGCGCCGcgcTACATCTACTGC     | Crc <sub>E142R</sub> /forward        |
| Q142 | GCAGTAGATGTAgcgGCGGCGCTTG    | Crc <sub>E142R</sub> /reverse        |
| L142 | CGCCCTGCGcgcGTCAGCCGC        | Crc <sub>E193R</sub> /forward        |
| M142 | GCGGCTGACgcgGCGCAGGGCG       | Crc <sub>E193R</sub> /reverse        |
| A145 | CCCCGGCCTAgaacGCTTCGTGCGC    | Crc <sub>R229E</sub> /forward        |
| B145 | GCGCACGAAGCGttcTAGGCCGGGG    | Crc <sub>R229E</sub> /reverse        |
| R142 | CGGCCTACGcgaatTCGTGCGCAAC    | Crc <sub>R230E</sub> /forward        |
| S142 | GTTGCGCACGAAttcGCGTAGGCCG    | Crc <sub>R230E</sub> /reverse        |
| I146 | CCCCGGCCTAgaagaaTTCGTGCGCAAC | Crc <sub>R299E, R230E</sub> /forward |
| J146 | GTTGCGCACGAAttcttcTAGGCCGGGG | Crc <sub>R299E, R230E</sub> /reverse |

<sup>a</sup> mutated sequences are shown in small letters

814  
815  
816  
817  
818  
819
